# Supplementary material for: Plasticizers: distribution and impact in aquatic and terrestrial environments
Source: Royal Society of Chemistry journal article supplement (doi:10.1039/d4em00317a), 2024-01-01
Supplement: d4em00317a1.pdf [file d4em00317a1.pdf]

## Supplementary material

### Plasticizers: Distribution and Impact in Aquatic and Terrestrial

#### Environments

Danushika C. Manatunga<sup>1,2</sup>, Madushika Sewwandi<sup>3</sup>, Kalani Imalka Perera<sup>3</sup>, Methmini Dilhara

Jayarathna<sup>3</sup>, Dinusha L. Peramune<sup>1</sup>, Rohan S. Dassanayake<sup>1</sup>, Sammani Ramanayaka<sup>3,4</sup>,

Meththika Vithanage<sup>3\*</sup>

<sup>1</sup>Department of Biosystems Technology, Faculty of Technology, University of Sri

Jayewardenepura, Pitipana, Homagama, 10206, Sri Lanka

<sup>2</sup>School of Pharmacy, University College London, 29-39 Brunswick Square, London WC1N

1AX, United Kingdom

<sup>3</sup>Ecosphere Resilience Research Center, University of Sri Jayewardenepura, Nugegoda, 10250,

Sri Lanka

<sup>4</sup>Lancaster Environment Centre, Lancaster University, Bailrigg, Lancaster LA1 4YW, United

Kingdom

**Table S1.** Classification of plasticizers according to their chemical type, examples and applications

| <b>Chemical type</b>   | <b>Examples</b>                                                                      | <b>Category as in primary function</b>                                               | <b>Applications</b>                                                                                                                                   | <b>Reference</b> |
|------------------------|--------------------------------------------------------------------------------------|--------------------------------------------------------------------------------------|-------------------------------------------------------------------------------------------------------------------------------------------------------|------------------|
| Phthalate esters       | DEHP, DINP, DIDP, DPHP, DTDP, DUP, L11P                                              | GP plasticizers                                                                      | PVC products                                                                                                                                          | 1, 2             |
| Terephthalate          | DEHTP                                                                                | Specialty plasticizers, GP plasticizers                                              | PVC products                                                                                                                                          | 3                |
| Dibasic acid esters    | DEHA, DINP, DEHZ, DIDA, DEHS                                                         | Low temperature plasticizers, Fast fusing plasticizers, Stain resistant plasticizers | Food coatings, Flexible PVC                                                                                                                           | 2, 4, 5          |
| Epoxy plasticizers     | ESO, TEHTM, Butyl, hexyl, and 2-ethyl hexyl esters of epoxidized stearic acid,       | GP plasticizers<br>Low-temperature esters                                            | PVC films, Medical equipment, Packaging, Lubricants, Laminate materials                                                                               | 6, 7             |
| Benzoate esters        | Dipropylene glycol dibenzoate                                                        | Fast fusing plasticizer, Stain resistant plasticizer, Low temperature plasticizers   | Water-based adhesives, Latex caulks, Polyurethanes, Injection mold, Urethane resin, Sealants, Cosmetics such as sun tan lotions                       | 8, 9             |
| Cyclohexanoate esters  | DC8CH , DC9CH                                                                        | GP plasticizers                                                                      | Phthalate alternative in toys and food contact products, Medical equipment                                                                            | 10               |
| Polymeric plasticizers | Polyesters                                                                           | Low volatility plasticizers                                                          | Vinyl decals, Vinyl electrical tape, Gaskets for refrigerators, Extraction resistant hose, Nonmigrating inks, PVC roofing membranes, PVC geomembranes | 11               |
| Phosphate esters       | Di-2-ethylhexyl phosphate, Tri-2-ethylhexyl phosphate, Tri-2-ethylhexyl-trimellitate | Flame retardant plasticizers                                                         | Data cables, Plenum cables, Electronic devices, Transportation fabrics, Wall hangings                                                                 | 12               |

|                |      |                          |                                              |    |
|----------------|------|--------------------------|----------------------------------------------|----|
| Citrate esters | ATBC | Fast fusing plasticizers | Food grade plastics, Medical equipment, Toys | 13 |
|----------------|------|--------------------------|----------------------------------------------|----|

**\*Note:** DEHP- Di-2-ethylhexyl phthalate, ATBC- Acetylated tributyl citrate, TEHTM- Tri-2-ethylhexyl trimellitate, DINP-Diisononyl phthalate, DIDP-Diisodecyl phthalate, DPHP- Di-2-propylheptyl phthalate, DTDP- Ditridecyl phthalate, DUP- Di-n-undecyl phthalate, DEHTP- Di-2-ethylhexyl terephthalate, DEHA- Di-2-ethylhexyl adipate, DINA- Diisononyl adipate, DEHZ- Di-2-ethylhexyl azelate, DIDA- Diisodecyl adipate, DEHS- di-2-ethylhexyl succinate, ESO- Epoxidized soybean oil, DC8CH- Di-2-ethylhexyl cyclohexanedicarboxylic acid ester, DC9CH- Cyclo- hexanedicarboxylic acid ester of isononyl alcohol, GP- general purpose.

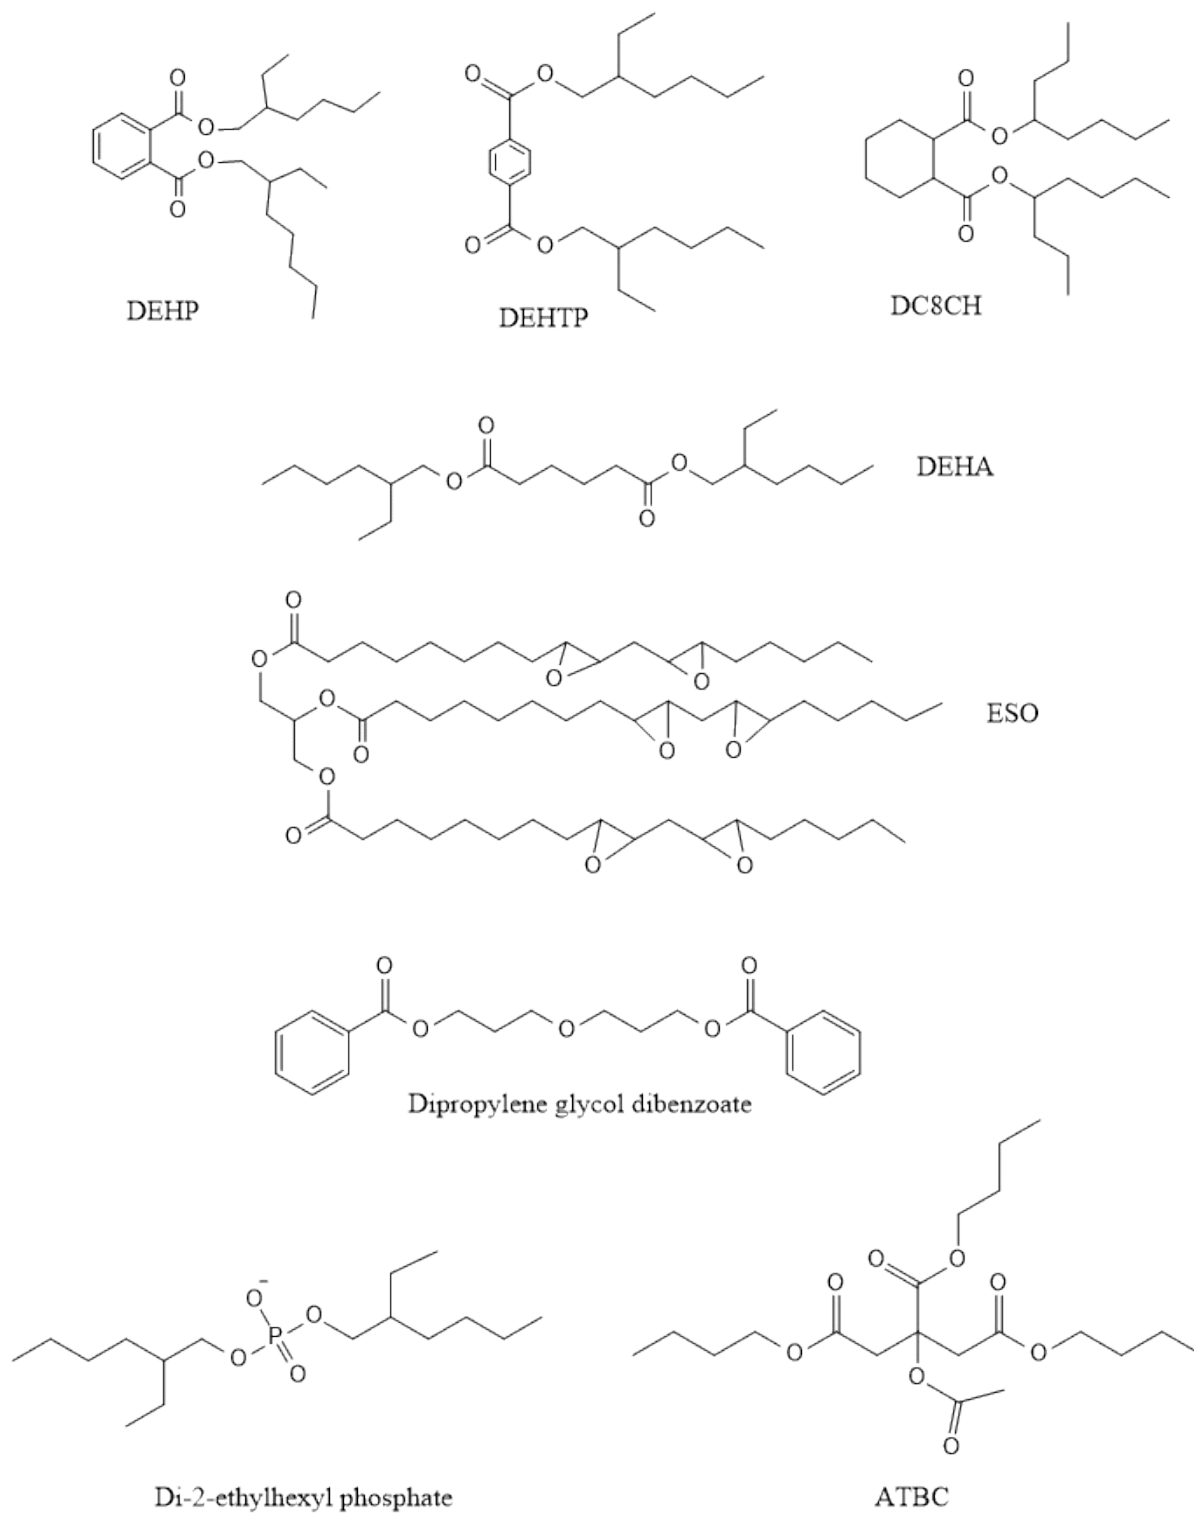

**Figure S1:** Chemical structures of plasticizers from main chemical types.

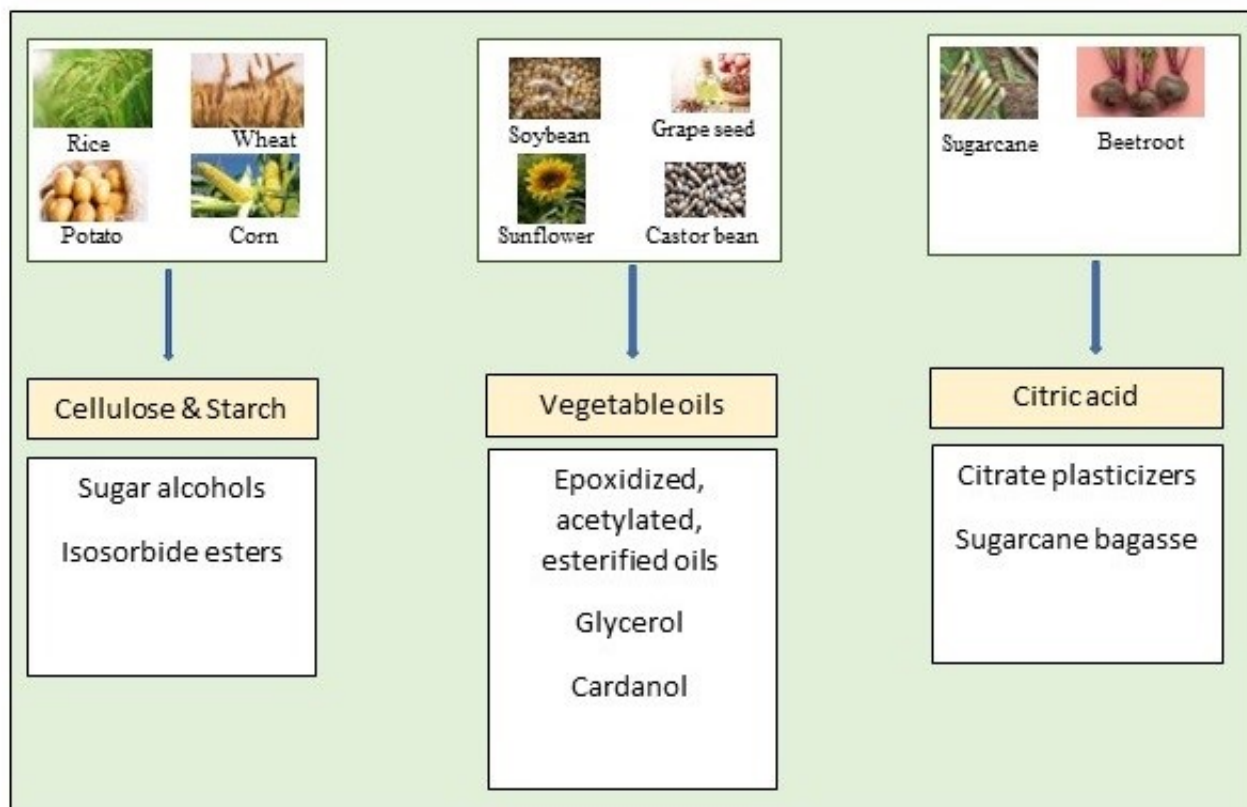

**Figure S2:** Sources of bio-based plasticizers.

**Table S2.** Physicochemical properties of some selected plasticizers

| Parameter                                      | DEHP                   | DEHTP             | DC8CH | DEHA              | ESO                | DPGDB               | DEH phosphate               | ATBC              |
|------------------------------------------------|------------------------|-------------------|-------|-------------------|--------------------|---------------------|-----------------------------|-------------------|
| Molecular weight (g/mol)                       | 390                    | 390               | 42    | 370               | 926                | 342                 | 210                         | 402               |
| Odour                                          | Odourless              | Odourless         | N/E   | Odourless         | Pungent odour      | Faint odour         | Odourless                   | Mild sweet odour  |
| Appearance                                     | Colourless oily liquid | Colourless liquid | N/E   | Colourless liquid | Pale yellow liquid | Straw colour liquid | Clear or pale-yellow liquid | Colourless liquid |
| Viscosity (at 20 °C)                           | 80                     | 65                | 60    | 15                | 325                | 215                 | 35                          | 43                |
| Density (at 20 °C, g/cm <sup>3</sup> )         | 0.986                  | 0.984             | 0.948 | 0.927             | 0.990              | 1.130               | 0.975                       | 1.050             |
| Efficiency factor (versus DEHP)                | 1.00                   | 1.04              | 1.09  | 0.94              | N/E                | 0.96                | N/E                         | 0.97              |
| Final gelation temperature (°C)                | 71                     | 82                | 83    | 70                | N/E                | 61                  | N/E                         | 61                |
| Low-temperature flexibility (Clash Berg T/ °C) | -25                    | -28               | -29   | -53               | N/E                | -7                  | N/E                         | -18               |
| Weight loss (%) after heating 1 week at 100 °C | 10.6                   | 5.5               | 7.5   | 27.5              | N/E                | 15.1                | N/E                         | >30               |

**\*Note:** DEHP- Di-2-ethylhexyl phthalate, DEHTP- Di-2-ethylhexyl terephthalate, DC8CH- Di-2-ethylhexyl, cyclohexanedicarboxylic acid ester DEHA- Di-2-ethylhexyl adipate, ESO- Epoxidized soybean, ATBC- Acetylated tributyl citrate, DPGDB- Dipropylene glycol dibenzoate, DEH phosphate- Di-2-ethylhexyl phosphate, N/E- No evidence.

**Table S3:** Global concentrations of plasticizers in water and their characteristics (To simplify the presentation of data, the reported values from previous studies have been rounded in this table)

| Country/<br>region/<br>Location           | Sample<br>Type       | Identification method | Plasticizers | Abundance (ng/L) | Reference |             |
|-------------------------------------------|----------------------|-----------------------|--------------|------------------|-----------|-------------|
| An urban<br>river in<br>Northern<br>China | River water          | GC-MS                 | DBP          | 1170 -15460      | 14        |             |
|                                           |                      |                       | DEHP         | 1170 -15460      |           |             |
|                                           |                      |                       | DIBP         | 1170 -15460      |           |             |
|                                           | Tap water            |                       | TBOEP        | 1.2 ± 0.6        | 15        |             |
|                                           |                      |                       | TCIPP        | 15.4 ± 6.4       |           |             |
|                                           | Bottled<br>water     |                       | TCEP         | 1.6 ± 1          |           |             |
|                                           |                      |                       | TPPO         | 22.2 ± 46.2      |           |             |
|                                           | Barcelona<br>(Spain) | Regular<br>cola       | LC-MS/MS     | EHDPP            |           | 0.8 ± 1.4   |
|                                           |                      |                       |              | TPPO             |           | 2.7 ± 3.6   |
|                                           |                      |                       |              | DCP              |           | 20.9 ± 30.7 |
| EHDPP                                     |                      |                       |              | 2738 ± 1665      |           |             |
| IDPP                                      |                      |                       |              | 6.9 ± 6          |           |             |
| TBOEP                                     |                      | 2.5 ± 2.7             |              |                  |           |             |
| TCIPP                                     |                      | 7.2 ± 6.9             |              |                  |           |             |
| TCP                                       |                      | 2.2 ± 3.3             |              |                  |           |             |
| TDCIPP                                    |                      | 3.5 ± 4.8             |              |                  |           |             |
| TEHP                                      |                      | 5.1 ± 5.1             |              |                  |           |             |
| Sugar-free<br>cola drinks                 |                      | TNBP                  | 2.5 ± 3.9    |                  |           |             |
|                                           |                      | TPHP                  | 39.8 ± 28.2  |                  |           |             |
|                                           |                      | TPPO                  | 45.5 ± 52.2  |                  |           |             |
|                                           |                      | EHDPP                 | 9.9 ± 16.8   |                  |           |             |
|                                           |                      | TBOEP                 | 0.6 ± 0.6    |                  |           |             |
| Juice                                     |                      | TCIPP                 | 8.7 ± 14.3   |                  |           |             |
|                                           |                      | TNBP                  | 5 ± 6.3      |                  |           |             |
|                                           |                      | TPPO                  | 79.9 ± 81.2  |                  |           |             |
|                                           |                      | EHDPP                 | 513 ± 1250   |                  |           |             |

|                                 |               |       |        |             |    |
|---------------------------------|---------------|-------|--------|-------------|----|
|                                 |               |       | TBOEP  | 14.1 ± 27.7 |    |
|                                 |               |       | TCIPP  | 9.4 ± 15.7  |    |
|                                 |               |       | TNBP   | 14 ± 42     |    |
|                                 |               |       | TPHP   | 157 ± 497   |    |
|                                 |               |       | TPPO   | 43.8 ± 47.4 |    |
|                                 |               |       | EHDPP  | 26.2 ± 29.2 |    |
|                                 |               |       | TBOEP  | 3.2 ± 1.9   |    |
|                                 |               |       | TCP    | 5 ± 7.6     |    |
|                                 |               |       | TNBP   | 4.4 ± 3.1   |    |
|                                 |               |       | TPHP   | 2.3 ± 2.6   |    |
|                                 |               |       | TPPO   | 7.3 ± 5.8   |    |
|                                 |               |       | TDCIPP | 20.4 ± 50.9 |    |
|                                 |               |       | TNBP   | 32.9 ± 62.1 |    |
|                                 |               |       | TPHP   | 5.1 ± 10.7  |    |
|                                 |               |       | TPPO   | 6.8 ± 10.4  |    |
|                                 |               |       | DCP    | 1.2 ± 0.8   |    |
|                                 |               |       | TCP    | 6.1 ± 6.1   |    |
|                                 |               |       | TNBP   | 19.5 ± 19.2 |    |
|                                 |               |       | TPHP   | 3.2 ± 5.4   |    |
|                                 |               |       | TPPO   | 8.4 ± 7.8   |    |
| Bengawan Solo River (Indonesia) | River water   | GC/MS | BPA    | ND-1070     | 16 |
| Brantas river (Indonesia)       |               |       | BPA    | ND-556      |    |
| Chania (Greece)                 | Stormwater    | HPLC  | BBP    | ND -1780    | 17 |
|                                 |               |       | DEHP   | ND -<MDL    |    |
|                                 |               |       | DEP    | ND -5600    |    |
|                                 |               |       | DMP    | ND -7900    |    |
|                                 |               |       | DNOP   | ND -<MDL    |    |
| Curonian Lagoon (Lithuania)     | Surface water | GC-MS | DEHP   |             | 18 |
|                                 |               |       | DiBP   | ND- 490     |    |
|                                 |               |       | DnBP   |             |    |



|                                                                                      |                        |       |                      |             |      |
|--------------------------------------------------------------------------------------|------------------------|-------|----------------------|-------------|------|
| Lithuania,<br>Curonian<br>Lagoon                                                     | Wastewater<br>effluent |       | DEHP<br>DiBP<br>DnBP | 110 –6170   |      |
| Nemunas<br>River<br>(Lithuania)                                                      | Surface<br>water       |       | DEHP<br>DiBP<br>DnBP | ND–1800     |      |
|                                                                                      |                        |       | BBP                  | 3 ± 2       |      |
|                                                                                      |                        |       | BMPP                 | 7± 8        |      |
|                                                                                      |                        |       | DBEP                 | 30 ± 30     |      |
|                                                                                      |                        |       | DBP                  | 90 ± 94     |      |
|                                                                                      |                        |       | DCHP                 | 22 ± 26     |      |
|                                                                                      |                        |       | DEEP                 | 6± 4        |      |
|                                                                                      |                        |       | DEHP                 | 4± 5        |      |
| Dongyang<br>River from<br>Yiwu, China.                                               | Surface<br>water       |       | DEP                  | 184± 157    |      |
|                                                                                      |                        |       | DIBP                 | 176± 167    |      |
|                                                                                      |                        |       | DMEP                 | 9± 7        |      |
|                                                                                      |                        |       | DMP                  | 54± 46      |      |
|                                                                                      |                        |       | DNHP                 | 4690 ± 5370 |      |
|                                                                                      |                        |       | DNOP                 | 8± 4        |      |
|                                                                                      |                        | GC–MS | DNP                  | 7± 10       | 19   |
|                                                                                      |                        |       | DPhP                 | 21 ± 14     | 1919 |
|                                                                                      |                        |       | DPP                  | 2± 1        |      |
|                                                                                      |                        |       | BBP                  | 1± 1        |      |
|                                                                                      |                        |       | BMPP                 | 12± 5       |      |
|                                                                                      |                        |       | DBEP                 | 178± 163    |      |
|                                                                                      |                        |       | DBP                  | 692± 719    |      |
|                                                                                      |                        |       | DCHP                 | 96± 81      |      |
|                                                                                      |                        |       | DEEP                 | 5± 4        |      |
|                                                                                      |                        |       | DEHP                 | 98 ± 73     |      |
|                                                                                      |                        |       | DEP                  | 2452± 1885  |      |
|                                                                                      |                        |       | DIBP                 | 485± 323    |      |
|                                                                                      |                        |       | DMEP                 | 14± 22      |      |
|                                                                                      |                        |       | DMP                  | 948± 889    |      |
| Wastewater<br>treatment<br>plants along<br>the Dongyang<br>River from<br>Yiwu, China | Influent<br>water      |       |                      |             |      |

|                                                                       |                |       |       |              |    |
|-----------------------------------------------------------------------|----------------|-------|-------|--------------|----|
|                                                                       |                |       | DNHP  | 3050 ± 25500 |    |
|                                                                       |                |       | DNOP  | 5 ± 5        |    |
|                                                                       |                |       | DNP   | 2 ± 3        |    |
|                                                                       |                |       | DPhP  | 24 ± 18      |    |
|                                                                       |                |       | DPP   | 3 ± 2        |    |
|                                                                       |                |       | BBP   | 1 ± 2        |    |
|                                                                       |                |       | BMPP  | 7 ± 5        |    |
|                                                                       |                |       | DBEP  | 36 ± 52      |    |
|                                                                       |                |       | DBP   | 19 ± 18      |    |
|                                                                       |                |       | DCHP  | 24 ± 30      |    |
|                                                                       |                |       | DEEP  | 7 ± 6        |    |
|                                                                       |                |       | DEHP  | 95 ± 32      |    |
|                                                                       |                |       | DEP   | 167 ± 126    |    |
|                                                                       |                |       | DIBP  | 82 ± 59      |    |
|                                                                       |                |       | DMEP  | 21 ± 16      |    |
|                                                                       |                |       | DMP   | 17 ± 7.      |    |
|                                                                       |                |       | DNHP  | 3740 ± 5180  |    |
|                                                                       |                |       | DNOP  | 10 ± 7       |    |
|                                                                       |                |       | DNP   | 5 ± 2        |    |
|                                                                       |                |       | DPhP  | 29 ± 24      |    |
|                                                                       |                |       | DPP   | 3 ± 5        |    |
|                                                                       |                |       | TBEP  | 30.2         |    |
|                                                                       |                |       | TDCPP | 7.7          |    |
|                                                                       |                |       | TmCP  | 19.9         |    |
|                                                                       |                |       | TnBP  | 2.1          |    |
|                                                                       |                |       | ToCP  | <MDL         |    |
|                                                                       |                |       | TpCP  | 36           |    |
|                                                                       |                |       | TPhP  | <MDL         | 20 |
|                                                                       |                |       | TBEP  | 34.5         |    |
|                                                                       |                |       | TDCPP | <MDL         |    |
|                                                                       |                |       | TmCP  | 60.7         |    |
|                                                                       |                |       | TnBP  | 2.6          |    |
|                                                                       |                |       | ToCP  | <MDL         |    |
| Wastewater treatment plants along the Dongyang River from Yiwu, China | Effluent water |       |       |              |    |
| East China Sea (China)                                                | Seawater       | GC-MS |       |              |    |
| Yellow Sea (China)                                                    |                |       |       |              |    |

|                             |                |                                                        |       |              |    |
|-----------------------------|----------------|--------------------------------------------------------|-------|--------------|----|
|                             |                |                                                        | TpCP  | 135.4        |    |
|                             |                |                                                        | TPhP  | <MDL         |    |
| Italy                       | Drinking Water | HPLC, UV-Visible Detector, Fluorescence Detector (FLD) | 4-NP  | 89.9         | 21 |
|                             |                |                                                        | BADGE | 353.7        |    |
|                             |                |                                                        | BPA   | 458.6        |    |
|                             |                |                                                        | BPAF  | 387.2        |    |
|                             |                |                                                        | BPB   | 43.5         |    |
|                             |                |                                                        | BPF   | 55.3         |    |
|                             |                |                                                        | BPS   | 30740        |    |
|                             |                |                                                        | DEHP  | 46190        |    |
|                             |                |                                                        | TCB   | 64070        |    |
|                             |                |                                                        | TCS   | 151080       |    |
| Kaveri River (India)        | River water    | GC-MS                                                  | BBP   | 3768± 13600  | 22 |
|                             |                |                                                        | DBEP  | 88± 500      |    |
|                             |                |                                                        | DBP   | 32220± 37200 |    |
|                             |                |                                                        | DCHP  | 986± 1300    |    |
|                             |                |                                                        | DEHP  | 4059± 5930   |    |
|                             |                |                                                        | DEP   | 1522± 1310   |    |
|                             |                |                                                        | DiBP  | 10530± 11300 |    |
|                             |                |                                                        | DMP   | 24± 50       |    |
|                             |                |                                                        | DNHP  | 206± 1040    |    |
|                             |                |                                                        | DnOP  | 657± 2660    |    |
| DNP                         | 257± 1370      |                                                        |       |              |    |
| DPP                         | 47 ± 260       |                                                        |       |              |    |
| Thamiraparani River (India) |                |                                                        | DBP   | 1983± 1930   |    |
|                             |                |                                                        | DCHP  | 711± 720     |    |
|                             |                |                                                        | DEHP  | 444± 750     |    |
|                             |                |                                                        | DEP   | 354± 240     |    |
|                             |                |                                                        | DiBP  | 1465± 1220   |    |
|                             |                |                                                        | DMP   | 8± 10        |    |
| DnOP                        | 0± 1           |                                                        |       |              |    |
| DNP                         | 8± 10          |                                                        |       |              |    |

|                                   |                  |                 |            |                               |    |
|-----------------------------------|------------------|-----------------|------------|-------------------------------|----|
| Vellar River<br>(India)           |                  |                 | DBP        | 28210± 34300                  |    |
|                                   |                  |                 | DCHP       | 10060± 23600                  |    |
|                                   |                  |                 | DEHP       | 4544± 6460                    |    |
|                                   |                  |                 | DEP        | 287± 190                      |    |
|                                   |                  |                 | DiBP       | 4345± 3040                    |    |
|                                   |                  |                 | DMP        | 4± 10                         |    |
| Maharashtra<br>coast (India)      | Coastal<br>water | GC-MS, LC-MS/MS | BPA<br>BPS | 75.3 - 101                    | 23 |
| Mar Menor<br>lagoon (SE<br>Spain) |                  |                 | DBP        | ND - (271000 ± 7000)          | 24 |
|                                   |                  |                 | DEHA       | ND - (31000± 2000)            |    |
|                                   |                  |                 | DEHP       | ND -(22000± 2000)             |    |
|                                   |                  |                 | DEP        | (85000± 4000)-(173000 ± 6000) |    |
|                                   |                  |                 | DIBP       | (13000± 1000)-(175000 ± 4000) |    |
|                                   |                  |                 |            |                               |    |
| Montreal<br><br>Bottled<br>Water  |                  |                 | DBP        | 56.2                          |    |
|                                   |                  |                 | DEHA       | 39.3                          |    |
|                                   |                  |                 | DEHP       | 153.3                         |    |
|                                   |                  |                 | DEP        | 17.3                          |    |
|                                   |                  |                 | DIDA       | 15.5                          |    |
|                                   |                  |                 | DINCH      | 156.6                         |    |
|                                   |                  |                 | DINP       | 175.5                         |    |
|                                   |                  |                 | MEHP       | 4.9                           |    |
|                                   |                  |                 |            |                               |    |
| Montreal<br><br>Drinking<br>Water |                  |                 | DBP        | 66.9                          | 25 |
|                                   |                  |                 | DEHA       | 31.3                          |    |
|                                   |                  |                 | DEHP       | 133.4                         |    |
|                                   |                  |                 | DEP        | 25.3                          |    |
|                                   |                  |                 | DIDA       | 8                             |    |
|                                   |                  |                 | DINCH      | 175                           |    |
|                                   |                  |                 | DINP       | 105.2                         |    |
|                                   |                  |                 | MEHP       | 6.4                           |    |
|                                   |                  |                 |            |                               |    |
| Pretoria<br>(South Africa)        |                  |                 | DBP        | 16.4                          |    |
|                                   |                  |                 | DEHA       | 32.8                          |    |
|                                   |                  |                 | DEHP       | 6.9                           |    |
|                                   |                  |                 | DEP        | 33                            |    |

|                                  |                   |          |       |               |    |
|----------------------------------|-------------------|----------|-------|---------------|----|
|                                  |                   |          | DIDA  | 21.8          |    |
|                                  |                   |          | DINCH | 36.6          |    |
|                                  |                   |          | DINP  | <LOQ          |    |
|                                  |                   |          | MEHP  | 6             |    |
|                                  |                   |          | DBP   | 27.3          |    |
|                                  |                   |          | DEHA  | 44.8          |    |
|                                  |                   |          | DEHP  | 8.1           |    |
|                                  |                   |          | DEP   | 38.9          |    |
| Vhembe<br>(South Africa)         |                   |          | DIDA  | 36.1          |    |
|                                  |                   |          | DINCH | 21.7          |    |
|                                  |                   |          | DINP  | <LOQ          |    |
|                                  |                   |          | MEHP  | 5.8           |    |
| Putrajaya,<br>Malaysia           | Drinking<br>water | LC-MS/MS | BPA   | 17.6          | 26 |
|                                  |                   |          |       | Dry Season    |    |
|                                  |                   |          | DBP   | ~370          |    |
|                                  |                   |          | DEHP  | ~2010         |    |
|                                  |                   |          | DEP   | ~114          |    |
|                                  |                   |          | DIBP  | ~2470         |    |
|                                  |                   |          | DMP   | ~541          |    |
|                                  |                   |          |       | Normal Season |    |
| Quanzhou<br>(Southeast<br>China) | Tap water         | GC-MS    | DBP   | ~1110         | 27 |
|                                  |                   |          | DEHP  | ~3350         |    |
|                                  |                   |          | DEP   | ~98           |    |
|                                  |                   |          | DIBP  | ~3310         |    |
|                                  |                   |          | DMP   | ~80.8         |    |
|                                  |                   |          |       | Wet Season    |    |
|                                  |                   |          | DBP   | ~1950         |    |
|                                  |                   |          | DEHP  | 2890          |    |
|                                  |                   |          | DEP   | 107           |    |
|                                  |                   |          | DIBP  | 4630          |    |
|                                  |                   |          | DMP   | 236           |    |

|                                                                          |                                      |                                                                               |                                                                                                      |                                                                                                                                                        |    |
|--------------------------------------------------------------------------|--------------------------------------|-------------------------------------------------------------------------------|------------------------------------------------------------------------------------------------------|--------------------------------------------------------------------------------------------------------------------------------------------------------|----|
| River catchments:<br>R. Liffey (Ireland), R. Thames (UK), R. Ter (Spain) | River water                          | Solid-phase extraction liquid chromatography-mass spectrometry (SPE-LC-MS/MS) | BPA<br>BPF<br>BPS                                                                                    | <LOQ<br><LOQ<br>79.00                                                                                                                                  | 28 |
| Rur River water samples (North Rhine-Westphalia, Germany)                | River water                          | GC-MS                                                                         | ATBC<br>BBP<br>DEHP<br>DEP<br>DIBP<br>DMP<br>DnBP<br>TA<br>TBP<br>TCEP<br>TCPP<br>TEC<br>TEP<br>TXIB | ND-340<br>ND-40<br>230-1400<br>50-2200<br>30-460<br>100-70<br>700-12000<br>3000- 118000<br>ND-20<br>ND-10<br><5.00-110<br><5.00-120<br>ND-220<br>10-70 | 29 |
| Sewage treatment plants in Tamil Nadu, India                             | Influent Water<br><br>Effluent Water | GC-MS                                                                         | BBP<br>DBP<br>DEHP<br>DEP<br>DMP<br>DnOP<br><br>BBP<br>DBP<br>DEHP<br>DEP<br>DMP<br>DnOP             | <LOD-3418<br><LOD-8169<br><LOD-11311<br><LOD-3552<br>23-84.<br><LOD-38<br><br>21-8885<br><LOD-10171<br><LOD-17618<br>32-7834<br>4-85<br><LOD-30        | 30 |

|                                           |                                     |                                                                                        |        |               |    |
|-------------------------------------------|-------------------------------------|----------------------------------------------------------------------------------------|--------|---------------|----|
| South Florida                             | Tap water                           | GC-MS                                                                                  | BBP    | 33.4          | 31 |
|                                           |                                     |                                                                                        | DBP    | 49.9          |    |
|                                           |                                     |                                                                                        | DEHP   | 81.5          |    |
|                                           |                                     |                                                                                        | DEP    | 31.4          |    |
|                                           |                                     |                                                                                        | DMP    | 34.9          |    |
|                                           |                                     |                                                                                        | DOP    | 85.4          |    |
| Sri Lanka                                 | Refilled PET bottled drinking water | GC-MS                                                                                  | DEHP   | 60000 - 85000 | 32 |
| Urban rivers of Bangladesh (Savar region) | River water                         | GC-MS                                                                                  | BBP    | 1620– 12570   | 33 |
|                                           |                                     |                                                                                        | DBP    | 70– 1820      |    |
|                                           |                                     |                                                                                        | DEHA   | 1570– 16590   |    |
|                                           |                                     |                                                                                        | DEHP   | 1780–17080    |    |
|                                           |                                     |                                                                                        | DEP    | 2040 – 4730   |    |
|                                           |                                     |                                                                                        | DMP    | 700– 2770     |    |
|                                           |                                     |                                                                                        | DNOP   | 510 – 9510    |    |
| Urban rivers of Bangladesh (Tongi Region) |                                     |                                                                                        | BBP    | 2370 – 14090  | 34 |
|                                           |                                     |                                                                                        | DBP    | 2200– 30520   |    |
|                                           |                                     |                                                                                        | DEHA   | 1790– 5560    |    |
|                                           |                                     |                                                                                        | DEHP   | 110– 5390     |    |
|                                           |                                     |                                                                                        | DEP    | 4240– 101900  |    |
|                                           |                                     |                                                                                        | DMP    | 2520– 480720  |    |
| Wuhan, China                              | Tap water                           | Ultra-performance liquid chromatography coupled with a tandem mass spectrometry system | TBOEP  | 0.8           | 34 |
|                                           |                                     |                                                                                        | TBP    | 1.4           |    |
|                                           |                                     |                                                                                        | TCEP   | 7.1           |    |
|                                           |                                     |                                                                                        | TCIPP  | 9.5           |    |
|                                           |                                     |                                                                                        | TDCIPP | 0.6           |    |
|                                           |                                     |                                                                                        | TEP    | 5.7           |    |
|                                           |                                     |                                                                                        | TMP    | 4.3           |    |
| TPhP                                      | 0.7                                 |                                                                                        |        |               |    |

|                                  |                                             |       |      |       |    |
|----------------------------------|---------------------------------------------|-------|------|-------|----|
| Yamuna<br>River, Delhi,<br>India | River water<br>in monsoon<br>months         | GC-MS | BBPH | 2920  | 35 |
|                                  | River water<br>in non-<br>monsoon<br>months |       | DPH  | 62890 |    |
|                                  |                                             |       | BBPH | 5560  |    |
|                                  |                                             |       | DPH  | 1140  |    |

**Note:** MDL- The method detection limits, LOQ- limit of quantification, LOD- limit of detection, ND- Not Detected, GC-MS- Gas chromatography/mass spectrometry, HPLC- High-performance liquid chromatography, LC-MS/MS- Liquid chromatography-tandem mass spectrometry

BBPH/BBP- Benzyl Butyl Phthalate, BPAF- Bisphenol AF, BPA- Bisphenol A, BPF- Bisphenol F, BPB- Bisphenol B, BPS- Bisphenol S, BMPP- Bis(4-Methyl-2-pentyl) Phthalate, BADGE- bisphenol A diglycidyl ether, DEHP- Di(2- ethylhexyl) phthalate, DEHA- Di(2-ethylhexyl) adipate, DMP- Dimethyl Phthalate, DEP- Diethyl Phthalate, DIBP- Di-iso-butyl Phthalate, DBP- Dibutyl Phthalate, DPhP- Diphenyl Phthalate, DNOP- Dioctyl Phthalate, DNP- Dinonyl Phthalate, DOP- Dioctyl Phthalate, DCP- Dicyclohexyl phthalate, DINCH- Di(isononyl) cyclohexane-1,2-dicarboxylate, DIDA- Diisodecyl Adipate, DINP- Diisononyl phthalate, DMEP- Dimethoxyethyl phthalate, DEEP- Bis-2-ethoxyethyl ester, DNHP- Di-n-hexyl phthalate, DBEP- Bis-2-butoxyethyl phthalate, DCHP- Dicyclohexyl phthalate, DNBP/DnBP- di-n-butyl phthalate, DHP- Dihexyl Phthalate, DIDP- Diisodecyl phthalate, DPH- Diethyl Phthalate, TA- Triacetin, TCPP/TCIPP- tris (1-chloro-2-propyl) phosphate, TCEP- Tris(2-chloroethyl) phosphate, TBOEP- Tris(2-butoxyethyl) phosphate, TEC- Triethylcitrate, TPHP/TPhP- Triphenyl phosphate, TEHP- Tris(2-ethylhexyl)phosphate, TCP- Tricresyl Phosphate, TDCPP/TDCIPP- Tris(1,3-dichloro-2-propyl)phosphate, TNBP/TnBP- Tri-n-butyl phosphate, TXIB- 2,4,4-Trimethylpentane-1,3-dioldi-iso-butyrate, TEP- Triethyl Phosphate, TMP- Trimethyl Phosphate, TBP- Tributyl phosphate, TBEP- Tributyoxyethyl Phosphate, ToCP- Tri-ortho-cresyl phosphate, TmCP- tri-meta-cresyl phosphate, TpCP- tri-para-cresyl phosphate, TCB- 1,2,4,5-tetrachlorobenzene, TCS- Triclosan, TPPO- triphenylphosphine oxide, EHDPP- 2-ethylhexyl diphenyl phosphate, MEHP- Mono(2-ethylhexyl)phthalate, ATBC- Acetyl Tributyl Citrate, IDPP- Isodecyl diphenyl phosphate, 4-NP- 4-Nonylphenol



**Table S4:** Global concentrations of plasticizers in soil/sediments and their characteristics (To simplify the presentation of data, the reported values from previous studies have been rounded in this table)

| Country/ region/ Location        | Identification method                                                                                                          | Plasticizers | Abundance (ng/g) | Reference |
|----------------------------------|--------------------------------------------------------------------------------------------------------------------------------|--------------|------------------|-----------|
| Dongting Lake (China)            | Ultra-high-performance liquid chromatography (UHPLC) coupled with an Agilent 6460A triple quadrupole mass spectrometry (MS/MS) | BPA          | ND-194           | 36        |
| East China Sea (China)           |                                                                                                                                | TBEP         | <MDL             |           |
|                                  |                                                                                                                                | TDCPP        | 1.3              |           |
|                                  |                                                                                                                                | TmCP         | 4.4              |           |
|                                  |                                                                                                                                | TnBP         | 5.3              |           |
|                                  |                                                                                                                                | ToCP         | <MDL             |           |
|                                  |                                                                                                                                | TpCP         | 2.9              |           |
|                                  |                                                                                                                                | TPhP         | 1.6              |           |
| Yellow Sea (China)               | GC-MS                                                                                                                          | TBEP         | <MDL             |           |
|                                  |                                                                                                                                | TDCPP        | 1.6              |           |
|                                  |                                                                                                                                | TmCP         | 4.6              | 20        |
|                                  |                                                                                                                                | TnBP         | 9                |           |
|                                  |                                                                                                                                | ToCP         | <MDL             |           |
|                                  |                                                                                                                                | TpCP         | 2.9              |           |
|                                  |                                                                                                                                | TPhP         | 1.7              |           |
| Rivers around Taihu Lake (China) | GC-MS                                                                                                                          | EHDPP        | 2.5              |           |
|                                  |                                                                                                                                | TBEP         | 5                |           |
|                                  |                                                                                                                                | TCEP         | 14               |           |
|                                  |                                                                                                                                | TCP          | 8                |           |
|                                  |                                                                                                                                | T CPP        | 18               |           |
|                                  |                                                                                                                                | TnBP         | 21.8             | 37        |
|                                  |                                                                                                                                | TPhP         | 3                |           |

|                       |       |       |           |    |
|-----------------------|-------|-------|-----------|----|
| Taihu Lake (China)    |       | EHDPP | 2.3       |    |
|                       |       | TBEP  | 32.8      |    |
|                       |       | TCEP  | 14.9      |    |
|                       |       | TCPP  | 40.2      |    |
|                       |       | TEHP  | 13.9      |    |
|                       |       | TEP   | 1.4       |    |
|                       |       | TnBP  | 19.62     |    |
|                       |       | TPhP  | 2         |    |
| Salt River (Taiwan)   | GC-MS | BBP   | 4.4       | 38 |
|                       |       | DEHP  | 2207      |    |
|                       |       | DEP   | 7         |    |
|                       |       | DHP   | 2.7       |    |
|                       |       | DiBP  | 4.9       |    |
|                       |       | DiDP  | 574       |    |
|                       |       | DiNP  | 1238      |    |
|                       |       | DMP   | 11.8      |    |
|                       |       | DnBP  | 23        |    |
|                       |       | DnOP  | 139       |    |
| Southern Finland      | GC-MS | ATBC  | 14± 3     | 39 |
|                       |       | BBP   | 40± 26    |    |
|                       |       | DBP   | 90± 32    |    |
|                       |       | DEHA  | 56± 10    |    |
|                       |       | DEP   | 45± 10    |    |
|                       |       | DMP   | <LOD      |    |
|                       |       | DNOP  | <LOD      |    |
| Yangtze River (China) | GC-MS | BBP   | 0–8.5     | 40 |
|                       |       | DBP   | 16.3–99.1 |    |
|                       |       | DEEP  | 0–8.5     |    |
|                       |       | DEHP  | 25–161.3  |    |
|                       |       | DEP   | 0–8.5     |    |
|                       |       | DIBP  | 10.7–55.8 |    |
|                       |       | DMEP  | 0–8.5     |    |
|                       |       | DMP   | 0–8.5     |    |

|      |       |
|------|-------|
| DnHP | 0–8.5 |
| DNOP | 0–8.5 |
| DNP  | 0–8.5 |
| DPhP | 0–8.5 |
| DPP  | 0–8.5 |

**\*Note:** MDL- The method detection limits, LOQ- limit of quantification, LOD- limit of detection, ND- Not Detected, GC-MS- Gas chromatography/mass spectrometry, HPLC- High-performance liquid chromatography, LC-MS/MS- Liquid chromatography-tandem mass spectrometry

BBPH/BBP-Benzyl Butyl Phthalate, BPAF- Bisphenol AF, BPA- Bisphenol A, BPF- Bisphenol F, BPB- Bisphenol B, BPS- Bisphenol S, BMPP- Bis(4-Methyl-2-pentyl) Phthalate, BADGE- bisphenol A diglycidyl ether, DEHP- Di(2-ethylhexyl) phthalate, DEHA- Di(2-ethylhexyl) adipate, DMP-Dimethyl Phthalate, DEP-Diethyl Phthalate, DIBP-Di-iso-butyl Phthalate, DBP-Dibutyl Phthalate, DPhP- Diphenyl Phthalate, DNOP- Dioctyl Phthalate, DNP- Dinonyl Phthalate, DOP- Dioctyl Phthalate, DCP-Dicyclohexyl phthalate, DINCH- Di(isononyl) cyclohexane-1,2-dicarboxylate, DIDA- Diisodecyl Adipate, DINP- Diisononyl phthalate, DMEP- Dimethoxyethyl phthalate, DEEP- Bis-2-ethoxyethyl ester, DNHP- Di-n-hexyl phthalate, DBEP- Bis-2-butoxyethyl phthalate, DCHP- Dicyclohexyl phthalate, DNBP/DnBP- di-n-butyl phthalate, DHP- Dihexyl Phthalate, DIDP- Diisodecyl phthalate, DPH- Diethyl Phthalate, TA- Triacetin, TCPP/TCIPP- tris (1-chloro-2-propyl) phosphate, TCEP- Tris(2-chloroethyl) phosphate, TBOEP- Tris(2-butoxyethyl) phosphate, TEC- Triethylcitrate, TPHP/TPhP- Triphenyl phosphate, TEHP- Tris(2-ethylhexyl)phosphate, TCP- Tricresyl Phosphate, TDCPP/TDCIPP- Tris(1,3-dichloro-2-propyl)phosphate, TNBP/TnBP- Tri-n-butyl phosphate, TXIB- 2,4,4-Trimethylpentane-1,3-dioldi-iso-butyrate, TEP- Triethyl Phosphate, TMP- Trimethyl Phosphate, TBP- Tributyl phosphate, TBEP- Tributoxyethyl Phosphate, ToCP- Tri-ortho-cresyl phosphate, TmCP- tri-meta-cresyl phosphate, TpCP- tri-para-cresyl phosphate, TCB- 1,2,4,5-tetrachlorobenzene, TCS- Triclosan, TPPO- triphenylphosphine oxide, EHDPP- 2-ethylhexyl diphenyl phosphate, MEHP- Mono(2-ethylhexyl)phthalate, ATBC- Acetyl Tributyl Citrate, IDPP- Isodecyl diphenyl phosphate, 4-NP- 4-Nonylphenol

**Table S5:** Recently discovered novel approaches on reducing the impact of plasticizers on the environment (To simplify the presentation of data, the reported values from previous studies have been rounded in this table)

| Medium | Plasticizer        | Removal method                                                                                                                        | Special parameters                                                                                                                                                                | Removal mechanism                                                                                                                                                                      | Removal capacity/efficiency                                                                                            | Reference |
|--------|--------------------|---------------------------------------------------------------------------------------------------------------------------------------|-----------------------------------------------------------------------------------------------------------------------------------------------------------------------------------|----------------------------------------------------------------------------------------------------------------------------------------------------------------------------------------|------------------------------------------------------------------------------------------------------------------------|-----------|
| Water  | BPS                | Metal-organic framework (MOF) MIL-101 (Chromium terephthalate metal-organic framework) with or without –NH <sub>2</sub> functionality | Adsorption of BPS was carried out over a wide pH range<br><br>MOF was recyclable after simple ethanol washing                                                                     | Hydrogen bonding between –S(=O) <sub>2</sub> and NH <sub>2</sub> of MIL-101-NH <sub>2</sub><br><br>H-bonding between –NH <sub>2</sub> of the MOF and –OH of BPS might also be possible | MIL- 101-NH <sub>2</sub> showed the highest adsorption capacity for BPS (513 mg/g, at pH 7)                            | 41        |
| Water  | PAEs (DEP and DBP) | Nitrogen-doped biochar (NBs) prepared from <i>Pistia stratiotes</i>                                                                   | NBs pyrolyzed at 700 °C                                                                                                                                                           | Intra-particle diffusion, multiple pore filling, and partitioning dominated the process                                                                                                | PAE:161.7 mg/g<br>DBP: 85.4 mg/g                                                                                       | 42        |
| Water  | BPA                | Ni metal and Ni <sub>3</sub> ZnC <sub>0.7</sub> alloy nanoparticle catalyst encapsulated in N-doped graphite (NiZn@N-G-900)           | N-doped graphite layer, Adjusts the surface charge distribution of the catalysts Improves the charge transfer ability between the catalyst and the adsorbate Lastly activates the | Mineralization followed by oxidation and β-scission                                                                                                                                    | NiZn@N-G-900/PMS system had strong inorganic anion resistance, high selectivity and satisfactory practical application | 43        |

---

PMS

---

|              |                   |                                                                                            |                                                                                                                                                    |                                                                                                                                |                                                                                                                                     |    |
|--------------|-------------------|--------------------------------------------------------------------------------------------|----------------------------------------------------------------------------------------------------------------------------------------------------|--------------------------------------------------------------------------------------------------------------------------------|-------------------------------------------------------------------------------------------------------------------------------------|----|
| <b>Water</b> | DMP               | Multi-wall carbon nanotubes (MWCNTs) and magnetic (Fe <sub>3</sub> O <sub>4</sub> ) MWCNTs | Adsorption processes were endothermic<br><br>Second-order kinetic model and the Freundlich isotherm model were well fit with the experimental data | Electrostatic interaction of DMP with (MWCNTs) and Fe <sub>3</sub> O <sub>4</sub> MWCNTs                                       | Removal capacity:<br><br>At 303 K, 196.9 mg/g for MWCNTs<br><br>137 mg/g for Fe <sub>3</sub> O <sub>4</sub> /MWCNTs)                | 44 |
| <b>Water</b> | Tri-ethyl citrate | Char-fortified filter beds                                                                 | NR                                                                                                                                                 | Hydrophobicity-driven sorption                                                                                                 | More than 50%                                                                                                                       | 45 |
| <b>Water</b> | BPA               | High-rate algal ponds (HRAPs)                                                              | With different hydraulic retention time (HRTs) 4 and 8 days                                                                                        | Biodegradation and photodegradation are the most important removal pathways (volatilization and sorption were solely achieved) | Removal efficiency ranged from negligible removal to more than 90%<br><br>Removal efficiencies were enhanced during the warm season | 46 |

---

|              |            |                                                                                                |                                                                                                                                                                                     |                                                                                                                                                                                                                                                                                                      |    |    |
|--------------|------------|------------------------------------------------------------------------------------------------|-------------------------------------------------------------------------------------------------------------------------------------------------------------------------------------|------------------------------------------------------------------------------------------------------------------------------------------------------------------------------------------------------------------------------------------------------------------------------------------------------|----|----|
| <b>Water</b> | BPA        | Use of •OH radicals, which are formed from water radiolysis by irradiation with $\gamma$ -rays | A detailed mechanism of radical reactions involving •OH radicals and superoxide radical anions ( $O_2^{\bullet-}$ ) was proposed leading to the formation of decomposition products | Gamma-radiolytic decomposition of BPA is much more efficient than numerous other advanced oxidation processes                                                                                                                                                                                        | 47 |    |
| <b>Water</b> | DBP<br>DEP | Marine-, freshwater-, and terrestrial-derived fungal strains                                   | 1-DS-2013-S2 and 1-DS-2013-S4 strains were isolated from sand containing algal debris from the alluvial zone and algae growing on breakwater groins, respectively                   | Cytochrome P450-dependent monohydroxylations of DBP and DEP<br><br>Oxidation of related metabolites, de-esterification via either hydrolytic cleavage or cytochrome P450-dependent oxidative O-dealkylation, transesterification, and demethylation steps<br><br>Finally yielding phthalic acid as a | NR | 48 |

|              |             |                                                                                                                                                             |                                                                                                                                                           |                                                                                                                                              |                                          |    |
|--------------|-------------|-------------------------------------------------------------------------------------------------------------------------------------------------------------|-----------------------------------------------------------------------------------------------------------------------------------------------------------|----------------------------------------------------------------------------------------------------------------------------------------------|------------------------------------------|----|
|              |             |                                                                                                                                                             |                                                                                                                                                           | central intermediate in all pathways                                                                                                         |                                          |    |
| <b>Water</b> | BPA         | FeCl <sub>3</sub> -activated seaweed carbon/MCM-41/alginate hydrogel composite (ECAC/MCM-41/ALG) cross-linked with calcium chloride (2% CaCl <sub>2</sub> ) | NR                                                                                                                                                        | Bio sorption via monolayer coverage<br><br>Bio sorption renewability could be achieved with five cycles up to 80% via and an ethanol elution | 222.3 mg/g at 50 °C                      | 49 |
| <b>Water</b> | BPA<br>DEHP | Supercritical water degradation (SCWD) and supercritical water partial oxidation (SCWPO) treatments                                                         | Long-chain alkenes were favorably removed via SCWD treatment, while long-chain alkanes were favorably removed through SCWPO treatment<br><br>DEHP and BPA | DEHP decomposed to 2-ethyl-1-hexanol and acetophenone<br><br>BPA decomposed to 4-tert-butylphenol, alkylated derivatives of                  | The maximum conversion could reach 98.1% | 50 |

|              |      |                                                                                                                                                                                                            |                                                                                                                                                                                                                                                                                                          |                                                                                                                                                                          |                                                                       |    |
|--------------|------|------------------------------------------------------------------------------------------------------------------------------------------------------------------------------------------------------------|----------------------------------------------------------------------------------------------------------------------------------------------------------------------------------------------------------------------------------------------------------------------------------------------------------|--------------------------------------------------------------------------------------------------------------------------------------------------------------------------|-----------------------------------------------------------------------|----|
|              |      |                                                                                                                                                                                                            | could be decomposed more thoroughly by SCWPO treatment than SCWD treatment                                                                                                                                                                                                                               | benzene, and phenol                                                                                                                                                      |                                                                       |    |
| <b>Water</b> | DBP  | Electrocatalytic oxidation (EO) technique<br><br>Anode: Electrocatalytic electrode of iridium-tantalum/titanium (IrO <sub>2</sub> -Ta <sub>2</sub> O <sub>5</sub> /Ti)<br>Cathode: Graphite as the cathode | Under a voltage gradient of 10 V/cm for 60 min<br><br>Removal efficiency of DBP remained about 90% and the surface structure of the IrO <sub>2</sub> -Ta <sub>2</sub> O <sub>5</sub> /Ti electrode was stable after using the IrO <sub>2</sub> -Ta <sub>2</sub> O <sub>5</sub> /Ti electrode three times | Production of hydroxyl radical (•OH) in the electrocatalytic electrode played a key role for decomposing the DBP                                                         | Removal efficiency: 90%                                               | 51 |
| <b>Water</b> | DEHP | Hybrid removal process: 250 mg/L toluene + sewage sludge biochar + <i>Pseudomonas</i> sp. ( <i>Acinetobacter</i> )                                                                                         | Required time: 2 days for the bioremoval of DEHP                                                                                                                                                                                                                                                         | Both DEHP and <i>Acinetobacter</i> sp. sorbed/ attached onto the tire surface<br><br>Isolated bacteria used the adsorbed DEHP as carbon and energy source for growth and | Removal efficiency: 94.9 ± 0.2%<br><br>Adsorption capacity: 10.3 mg/g | 52 |



|              |      |                                                                                                 |                                                                                                                                                                                      |                                                                                                                                                                                                                                                                |                                                    |    |
|--------------|------|-------------------------------------------------------------------------------------------------|--------------------------------------------------------------------------------------------------------------------------------------------------------------------------------------|----------------------------------------------------------------------------------------------------------------------------------------------------------------------------------------------------------------------------------------------------------------|----------------------------------------------------|----|
|              |      |                                                                                                 |                                                                                                                                                                                      | colonize the tire surface                                                                                                                                                                                                                                      |                                                    |    |
| <b>Water</b> | DEHP | Activated sludge process                                                                        | At a mixed liquor suspended solid (MLSS) concentration range of 3461-4972 mg/L<br><br>DEHP removal showed an increasing trend at higher oxygen uptake rate and sludge retention time | Biodegradation of DEHP                                                                                                                                                                                                                                         | Overall removal capacity: 23.9 (mg DEHP /g MLSS.d) | 53 |
| <b>Water</b> | BPS  | Hydroxylamine enhanced zero-valent copper (Cu <sup>0</sup> ) catalyzed peroxymonosulfate system | Highly efficient in the pH range of 3.0-7.0                                                                                                                                          | Reactive species: •OH and SO <sub>4</sub> <sup>•-</sup><br><br>Hydroxylamine addition accelerated the reduction of Cu <sup>2+</sup> to Cu <sup>+</sup> as well as the corrosion of Cu <sup>0</sup><br><br>N <sub>2</sub> was the main product of hydroxylamine | Degradation efficiency: 87%–19.74%                 | 54 |
| <b>Water</b> | BPA  | Hybrid material, Fe <sub>2</sub> O <sub>3</sub> -graphene oxide (GO) hybrid containing 22.8% of | Fe <sub>2</sub> O <sub>3</sub> -GO exhibited a greater solid/liquid separation performance,                                                                                          | Lewis acid-base (AB) interactions between the active sites on Fe <sub>2</sub> O <sub>3</sub> and                                                                                                                                                               | Adsorption capacity: 3293.9 mg/g                   | 55 |

|              |                                   |                                                                                                     |                                                                                                                                                             |                                                                                                                                                                   |                                                                                         |    |
|--------------|-----------------------------------|-----------------------------------------------------------------------------------------------------|-------------------------------------------------------------------------------------------------------------------------------------------------------------|-------------------------------------------------------------------------------------------------------------------------------------------------------------------|-----------------------------------------------------------------------------------------|----|
|              |                                   | GO                                                                                                  | thermal stability, and a better anti-fouling performance                                                                                                    | BPA anions                                                                                                                                                        |                                                                                         |    |
|              |                                   |                                                                                                     | Lowered GO content of the hybrid saved 77.2% of the adsorbent cost                                                                                          |                                                                                                                                                                   |                                                                                         |    |
| <b>Water</b> | 2-CP<br>PE<br>DMP<br>m-DCB<br>DEP | Electrochemical system:<br><br>Electro peroxone with a solid polymer electrolyte (EP-SPE)           | Electrolysis energy consumption of 170 kWh·kg <sup>-1</sup> ·TOC <sub>1</sub><br><br>Dissolved organic pollutants weaken the mineralization of plasticizers | Degradation occurs through reactive oxidizing species (O <sub>3</sub> , •OH, and O <sub>2</sub> <sup>-</sup> )                                                    | Removal efficiency: 50% of degradation and mineralization within 10 min                 | 56 |
| <b>Water</b> | BPA                               | Adsorbent: Acid-leached carbon black waste (LCBW), a carbonaceous residue from petroleum refineries | Spiked BPA concentration: 10 ppm                                                                                                                            | Internal diffusion through the pores of the adsorbent<br><br>Surface adsorption through π- π interactions<br><br>Overall: Combination of diffusion and adsorption | 90-99% removal of BPA<br><br>>85% of the adsorption occurred within 1 h of contact time | 57 |

|              |     |                                                                                                                                                                     |                                                                                                                                                                                                                                             |                                                                                                                 |                                       |    |
|--------------|-----|---------------------------------------------------------------------------------------------------------------------------------------------------------------------|---------------------------------------------------------------------------------------------------------------------------------------------------------------------------------------------------------------------------------------------|-----------------------------------------------------------------------------------------------------------------|---------------------------------------|----|
| <b>Water</b> | BPA | Series of cross-linked $\beta$ -cyclodextrin polymers ( $\beta$ -CDPs) with hierarchically micro-mesoporous structure                                               | Easily regenerated by simple ethanol cleaning and kept high removal ability over 5 cycles                                                                                                                                                   | Open diffusion pathway and fast mass transfer offered by under the synergic effect of micropores and mesopores. | Maximum adsorption capacity: 502 mg/g | 58 |
| <b>Water</b> | DEP | Correction 3D-QSAR model and typical plasticizer-degrading bacteria ( <i>Burkholderia cepacia</i> , <i>Archaeoglobus fulgidus</i> , <i>Pseudomonas aeruginosa</i> ) | Degradative Phthalate dioxygenase reductase from <i>Burkholderia cepacia</i><br>Esterase from <i>Archaeoglobus fulgidus</i><br>Carboxylesterase from <i>Pseudomonas aeruginosa</i><br><br>Phthalate derivatives: DEP-27, DEP-28, and DEP-29 | DEP hydrolyzed under the action of the plasticizer-degrading enzymes                                            | NR                                    | 59 |

|              |             |                                                                                                               |                                                                                                                                                                                     |                                                                                                                                              |                                                                                                                                                                             |    |
|--------------|-------------|---------------------------------------------------------------------------------------------------------------|-------------------------------------------------------------------------------------------------------------------------------------------------------------------------------------|----------------------------------------------------------------------------------------------------------------------------------------------|-----------------------------------------------------------------------------------------------------------------------------------------------------------------------------|----|
|              |             |                                                                                                               | For DEHP removal:<br>MAB dose: 3.6 g/L<br>Temperature: 49 °C<br>Adsorption time:<br>454 min                                                                                         |                                                                                                                                              |                                                                                                                                                                             |    |
| <b>Water</b> | DEHP<br>DBP | Magnetic-activated<br>biochar made from<br>rice bran                                                          | For DBP removal:<br>MAB dose: 3.7 g/L<br>Temperature: 36 °C<br>Adsorption time:<br>312 min                                                                                          | Monolayer<br>adsorption                                                                                                                      | Adsorption capacity:<br>DEHP:13.2–16.4 mg/g<br>DBP: 3.6–5.7 mg/g                                                                                                            | 60 |
|              |             |                                                                                                               | Ethanol was used to<br>remove the adsorbed<br>DEHP and DBP                                                                                                                          |                                                                                                                                              |                                                                                                                                                                             |    |
| <b>Water</b> | DMP         | High frequency<br>discharge plasma<br>system driven by a<br>high-frequency<br>electric source<br>(CTP-2000 K) | DMP removal<br>performance<br>increased with<br>increase in pH                                                                                                                      | Hydrated<br>electrons, •OH,<br><sup>1</sup> O <sub>2</sub> , and •O <sub>2</sub> <sup>-</sup><br>supports the<br>oxidative removal<br>of DMP | 80.4% of TOC was<br>removed after 30 min<br>of treatment                                                                                                                    | 61 |
| <b>Water</b> | TBBPA       | Dielectric barrier<br>discharge (DBD)<br>plasma                                                               | Time duration for<br>the oxidation<br>treatment: 15<br>minutes<br><br>Removal process<br>depends on the<br>discharge voltage,<br>initial TBBPA<br>concentration, and<br>solution pH | Decomposition of<br>TBBPA in the<br>presence of<br>oxidative species:<br>•OH, <sup>1</sup> O <sub>2</sub> , and •O <sub>2</sub> <sup>-</sup> | Removal efficiency:<br><br>74.9%: at 12 kV<br>96.7% : at 18 kV<br><br>97%: at pH 7<br>98%: at pH 9<br>99%: at pH 11<br><br>100% :at 50 mg/L<br>(TBBPA)<br>53% : at 200 mg/L | 62 |

---

(TBBPA)

---

|              |            |                                                                                      |                                                                                                                                                        |                                                                                                                            |                                                                                                             |    |
|--------------|------------|--------------------------------------------------------------------------------------|--------------------------------------------------------------------------------------------------------------------------------------------------------|----------------------------------------------------------------------------------------------------------------------------|-------------------------------------------------------------------------------------------------------------|----|
| <b>Water</b> | DMP        | Photoelectrocatalytic (PEC) process with 3D (001)TiO <sub>2</sub> /Ti photoelectrode | Removal efficiency depends on:<br>Distance between 3D TiO <sub>2</sub> /Ti photoelectrode the light source<br>Coexisting ions<br>pH<br>Light intensity | Free radicals ( $\bullet\text{OH}$ and $\bullet\text{O}_2^-$ ) greatly participate to the PEC oxidation and removal of DMP | Degradation efficiency: nearly 100%<br>TOC removal efficiency: 89.4 %<br>Removal rate after 8 cycles: 97.7% | 63 |
| <b>Water</b> | Phthalates | Indigenously developed CuO/TiO <sub>2</sub> coated ceramic ultrafiltration membrane  | Removal efficiency was increased with time and constant after introducing 5 bar pressure to the filtration process                                     | Surface adsorption to the membrane<br>Shift in FTIR peak for Cu-O bond reveals its involvement in adsorption process.      | Removal efficiency of >99%.                                                                                 | 64 |
| <b>Water</b> | BPA        | Macro-porous membranes doped with micro-mesoporous $\beta$ -cyclodextrin             | $\beta$ -CDP membranes could be easily regenerated by simple ethanol filtration                                                                        | Formation of hydrophobic interaction and intermolecular hydrogen bonding                                                   | Removal efficiency: >99.9%<br>Dynamic adsorption capacity of the                                            | 65 |

|              |                     |                                                                                     |                                                                                                                                        |                                                                                                                                                           |                                                                            |    |
|--------------|---------------------|-------------------------------------------------------------------------------------|----------------------------------------------------------------------------------------------------------------------------------------|-----------------------------------------------------------------------------------------------------------------------------------------------------------|----------------------------------------------------------------------------|----|
|              |                     | polymers ( $\beta$ -CDP), named $\beta$ -CDP membranes                              |                                                                                                                                        |                                                                                                                                                           | membrane was equal to the static maximum adsorption capacity               |    |
|              |                     |                                                                                     |                                                                                                                                        |                                                                                                                                                           | Removal efficiency depends on the molecule size and chemical functionality |    |
| <b>Water</b> | o-phthalates        | Denitrifying <i>Betaproteobacteria</i> ( <i>Aromatoleum aromaticum</i> )            | Phthaloyl-CoA decarboxylase and Succinyl-CoA: o-phthalate CoA-transferase generate phthaloyl-CoA enzymes co-evolve for the degradation | Anaerobic mineralization, decarboxylation, and ester hydrolysis                                                                                           | NR                                                                         | 66 |
| <b>Water</b> | DBP<br>DEHP<br>ATBC | Two newly isolated bacteria (i.e. Mycobacterium sp. DBP42 and Halomonas sp. ATBC28) | Microbes which are able to grow using a range of plasticizers were enriched and isolated from marine plastic debris                    | Different mechanisms used for ester side-chain removal from the different plasticizers (esterases and enzymes involved in the $\beta$ -oxidation pathway) | NR                                                                         | 67 |
| <b>Water</b> | BPA                 | $\beta$ -cyclodextrin ( $\beta$ -CD) modified graphene oxide (CDGO) membrane        | CDGO membranes can be regenerated easily by washing with ethanol                                                                       | $\beta$ -CD molecules can form stable complexes with BPA molecules through host-guest recognition                                                         | Removal efficiency: about 100%                                             | 68 |

|              |     |                                                                                                                                                                                                                      |                                                                                                                                                                                                                                                                                                                |                                                                                                                                                                                                                             |                                                                        |    |
|--------------|-----|----------------------------------------------------------------------------------------------------------------------------------------------------------------------------------------------------------------------|----------------------------------------------------------------------------------------------------------------------------------------------------------------------------------------------------------------------------------------------------------------------------------------------------------------|-----------------------------------------------------------------------------------------------------------------------------------------------------------------------------------------------------------------------------|------------------------------------------------------------------------|----|
| <b>Water</b> | BPA | Polymer inclusion membrane (PIM) containing derivatives of calix[4]resorcinarene as the carrier, cellulose triacetate (CTA) as the base polymer, and 2-nitrophenyloctylether (2-NPOE) as a plasticizer has been used | <p>Stirring speed: 600 rpm<br/> pH of feed phase: pH 4<br/> Initial concentration of,<br/> BPA: 100 mg/dm<sup>3</sup><br/> Carrier content: 400 mg/g<br/> Plasticizer: 3 mL/g CTA</p> <p>Removal depends on: Concentration of the carrier<br/> pH of the aqueous feed phase<br/> Thickness of the membrane</p> | Mass transfer of BPA from the source phase to the receiving phase through a PIM system through hydrogen bonds between the hydroxyl group of calix and hydroxyl group of BPA, cation- $\pi$ , and $\pi$ - $\pi$ interactions | 90% removal efficient in 5 days                                        | 69 |
| <b>Water</b> | DBP | Ultrasonic technology                                                                                                                                                                                                | <p>Ultrasonic waves, which have oxidative properties over a wide range of pH value</p> <p>Ultrasonic methods did not influence on chemical oxygen demand, total organic carbon, total nitrogen, ammonium nitrogen (N-NH<sub>4</sub><sup>+</sup>), and total phosphorus</p>                                     | Oxidative degradation through hydroxyl-radical scavengers ( $\bullet$ OH)                                                                                                                                                   | Removal efficiency:<br>33.4%: 15 min<br>37.6%: 30 min<br>54.6%: 60 min | 70 |

|              |                                    |                                                                                 |                                                                                                                                             |                                                                                                                                                          |                                                                                  |    |
|--------------|------------------------------------|---------------------------------------------------------------------------------|---------------------------------------------------------------------------------------------------------------------------------------------|----------------------------------------------------------------------------------------------------------------------------------------------------------|----------------------------------------------------------------------------------|----|
|              |                                    |                                                                                 | removal                                                                                                                                     |                                                                                                                                                          |                                                                                  |    |
|              |                                    |                                                                                 | Ultrasonic degradation was found to depend on the amplitude of the wave                                                                     |                                                                                                                                                          |                                                                                  |    |
| <b>Water</b> | BPA                                | Activated sludge (AS) and horizontal subsurface flow (HSSF) constructed wetland | AS system had the best removal performance                                                                                                  | AS system: Microbial processes (biodegradation) and adsorption onto sludge flocs<br><br>HSSF system: Anaerobic degradation                               | Removal efficiency:<br>AS system: 87%<br>HSSF system: 55%                        | 71 |
| <b>Water</b> | Phthalic acid<br>Iso-phthalic acid | Basic anion exchange resin Finex AS510GC                                        | Sorption of phthalic acid onto anion exchange resin is feasible, spontaneous and exothermic<br><br>Resin can be regenerated using 1.0 M HCl | Sorption of IPA and OPA onto ion exchange resin is more of monolayer sorption rather than sorption on a surface having heterogeneous energy distribution | Adsorption capacity:<br>Phthalic acid: 397.8 mg/g<br>Isophthalic acid 331.3 mg/g | 72 |



|              |                                         |                                                                                                                                                               |                                                                                                                                                                                                    |                                                                                                                                                                                                                                                                                    |                             |    |
|--------------|-----------------------------------------|---------------------------------------------------------------------------------------------------------------------------------------------------------------|----------------------------------------------------------------------------------------------------------------------------------------------------------------------------------------------------|------------------------------------------------------------------------------------------------------------------------------------------------------------------------------------------------------------------------------------------------------------------------------------|-----------------------------|----|
| <b>Water</b> | OPEs:<br>TCIPP<br>TCEP<br>TNBP<br>TBOEP | Advanced drinking<br>water treatment<br>plants (DWTPs)<br><br>ozonation and GAC<br>filtration treatments                                                      | Degradation<br>through direct<br>oxidation by<br>molecular O <sub>3</sub> and<br>in- direct oxidation<br>by •OH radicals<br>generated in chain<br>reactions between<br>ozone and<br>hydroxide ions | GAC filtration and<br>ozonation together<br>removed around 50%<br>of the total OPE<br>concentrations<br><br>Removal efficiency:<br>From ozonation<br>treatment:<br>TNBP: 43.1%<br>TBOEP: 40.9%<br>TPHP: 46.5%<br>TEP: 7.77%<br><br>From GAC filtration:<br>TCIPP: 84%<br>TCEP: 49% | 73                          |    |
| <b>Water</b> | BPA                                     | Amino-<br>functionalized<br>polypropylene<br>nonwoven/graphene<br>oxide (GO) hybrid<br>material (PP-g-<br>DMAEMA/GO)<br>with dual-scale<br>channels structure | Flow rate: 40<br>mL/min<br>Contact time: 3.4 s                                                                                                                                                     | GO surface formed<br>hydrogen bonds<br>with the BPA<br>carrying water<br>molecules<br><br>Later on, BPA<br>molecules are<br>collided with GO<br>surface and<br>interact effectively<br>with GO through<br>$\pi$ - $\pi$ interactions                                               | Removal efficiency:<br>>80% | 74 |

|              |                     |                                                                                                                              |                                                                                                                                                                                                                 |                                                                                                                                                                                                                                              |                                |    |
|--------------|---------------------|------------------------------------------------------------------------------------------------------------------------------|-----------------------------------------------------------------------------------------------------------------------------------------------------------------------------------------------------------------|----------------------------------------------------------------------------------------------------------------------------------------------------------------------------------------------------------------------------------------------|--------------------------------|----|
| <b>Water</b> | DMP                 | Intermittently-aerated subsurface flow constructed wetlands                                                                  | CWs can purify DMP efficiently within a certain concentration range                                                                                                                                             | DMP was degraded into some smaller molecular fractions by the microbial degradation<br><br>DMP degradation intermediates mainly including MMP and PA, which might provide a potential carbon source for the denitrification processes in CWs | Removal efficiency: 88.5-97.8% | 75 |
| <b>Water</b> | DBP<br>DIBP<br>DEHP | In this study, supercritical fluid extraction (SFE) was performed to remove phthalates in spores of <i>Ganoderma lucidum</i> | No significant differences in polysaccharides content and fatty acid composition were observed between SFE and control spores<br><br>SFE is a potential approach to remove phthalate from food related products | Hydrolysis and oxidation                                                                                                                                                                                                                     | Removal efficiency: 100%       | 76 |

|              |                                                                                                 |                                                                                                                         |                                                                                                                                                                                                                                  |                                                                                       |                                          |                                                                       |
|--------------|-------------------------------------------------------------------------------------------------|-------------------------------------------------------------------------------------------------------------------------|----------------------------------------------------------------------------------------------------------------------------------------------------------------------------------------------------------------------------------|---------------------------------------------------------------------------------------|------------------------------------------|-----------------------------------------------------------------------|
| <b>Water</b> | PAEs<br>(DEHP,<br>DBP, DOTP)                                                                    | Waste water<br>treatment plant                                                                                          |                                                                                                                                                                                                                                  |                                                                                       |                                          |                                                                       |
|              |                                                                                                 | Primary clarifier,                                                                                                      |                                                                                                                                                                                                                                  |                                                                                       |                                          |                                                                       |
|              |                                                                                                 | Secondary clarifier<br>(anaerobic, first-<br>anoxic, first-aerobic,<br>second-anoxic, and<br>second-aerobic<br>systems) | Biological treatment<br>and ozonation<br>played a limited role<br>in the removal of<br>DBP and DOTP                                                                                                                              | Biological<br>oxidation<br>Photo oxidation<br>Degradation<br>through free<br>radicals | From whole process:<br>About 82% of DHEP | From Biological<br>treatment:<br>DEHP: 77%<br>DBP: -43%<br>DOTP: -82% |
|              | Tertiary treatment<br>system (hyper-<br>filtration, ozonation,<br>and ultraviolet<br>processes) |                                                                                                                         |                                                                                                                                                                                                                                  |                                                                                       |                                          |                                                                       |
| <b>Water</b> | Plasticizers<br>in waste<br>water                                                               | Ozone micro-bubble<br>oxidation                                                                                         | Reaction time: 45<br>Pressure: 0.150 MPa<br>Ozone<br>concentration: 100%<br>Flow: 0.7 L/min<br><br>When pH value<br>increased from 3.23<br>to 7.54, dissolved<br>oxygen of the<br>wastewater<br>increased from 3.8<br>to 4.5mg/L | Ozone micro-<br>bubble technology<br>can generate high<br>hydroxyl radicals           | COD removal rate<br>reached up to 94.1%. | 78                                                                    |
| <b>Soil</b>  | DOP                                                                                             | Halotolerant<br>bacterial consortium<br>(LF)                                                                            | Enriched<br>temperature 30°C,<br>pH                                                                                                                                                                                              | Biodegradation                                                                        | Removal efficiency:<br>96.3%             | 79                                                                    |

|                     |                                                                                                                                                             |                                                                                                                                                     |                                                                                                             |                                                                                                  |    |
|---------------------|-------------------------------------------------------------------------------------------------------------------------------------------------------------|-----------------------------------------------------------------------------------------------------------------------------------------------------|-------------------------------------------------------------------------------------------------------------|--------------------------------------------------------------------------------------------------|----|
|                     |                                                                                                                                                             | 6.0, inoculum size >5%, and salt content <3%.                                                                                                       |                                                                                                             | Removal capacity: 100 mg/kg<br>Removal efficiency: 89.3%                                         |    |
| DIAP and DEHP       | An aerobic slurry-phase reactor using indigenous and acclimated microorganisms from the sludge of a wastewater treatment plant of the plasticizers industry | Duration: 120days                                                                                                                                   | Acid hydrolysis of esters<br>The consortia of microorganisms was essential to the biodegradation            | Removal efficiencies: > 61%                                                                      | 80 |
| BEHA<br>DOP<br>DOTP | <i>Rhodococcus rhodochrous</i> was grown with hexadecane as a co-substrate                                                                                  | Reaction intermediates were 2-ethylhexanol and 2-ethylhexanoic acid                                                                                 | All three plasticizers involving hydrolysis of the ester bonds followed by oxidation releasing alcohol      | BEHA was completely degraded<br>DOP was degraded slightly<br>About half of the DOTP was degraded | 81 |
| DEHP and DEHA       | In the presence of microorganisms ( <i>Rhodococcus rhodochrous</i> )                                                                                        | Two metabolites; 2-ethylhexanol and 2-ethylhexanoic acid which are able to further degrade undergoing mineralization in the gas phase were produced | Enzymatic hydrolysis followed by oxidation of the released alcohol to eventually yield 2-ethylhexanoic acid | NR                                                                                               | 82 |

|     |                                                                                                                                               |                                                                                                 |                                                                                                                  |                                                                                                                         |    |
|-----|-----------------------------------------------------------------------------------------------------------------------------------------------|-------------------------------------------------------------------------------------------------|------------------------------------------------------------------------------------------------------------------|-------------------------------------------------------------------------------------------------------------------------|----|
| DEP | Bacterial isolates namely <i>Achromobacter</i> sp. strain DEPA3, <i>Pseudomonas</i> sp. strain DEP3, and <i>Enterobacter</i> sp. strain DEPC1 | Three bacterial isolates individually and as a consortium were effective in degrading DEP       | DEP was converted completely to CO <sub>2</sub> and H <sub>2</sub> O. Monomethyl phthalate are the intermediates | 81.2–92.4% degradation occurred within 30 days of inoculation                                                           | 83 |
| DOP | <i>Gordonia</i> sp. (Lff) was used                                                                                                            | Degradation capacity is not enough to remove DOP from the contaminated soil within a short time | NR                                                                                                               | DOP concentration decreased from 100.0 mg/kg to 35.2 (DEG-3) and 38.6 (DEG-4) mg/kg, respectively, after 5-d incubation | 84 |

**\*Note:** BPS- Bisphenol S, BPA- Bisphenol A, DMP- Dimethyl phthalate, DBP- Di-n-butyl phthalate, DIBP- Di-iso-butyl phthalate, DEP- Diethyl phthalate, DEHP- Di-(2-ethylhexyl) phthalate, 2-CP- o-chlorophenol, PE- Phenol, m-DCB- 1,3-dichlorobenzene, DOP- Di-n-octyl phthalate, TBBPA- Tetrabromobisphenol A, ATBC- Acetyl tributyl citrate, OPEs- organophosphate esters, TEP- Triethyl phosphate, TCEP- Tris(2-chloroethyl)phosphate, TCIPP- Tris(1-chloro-2-propyl)phosphate, TNBP- Tri-n-butyl phosphate, TBOEP- Tris(2-butoxyethyl) phosphate, TPHP- Triphenyl phosphate, MMP- Monomethyl phthalate (MMP), PA- Phthalate, DOTP- bis(2-ethylhexyl) ester, PAEs- Phthalate esters, DIAP- Diisoamyl phthalate, DEHA- di-2-ethylhexyl adipate, BEHA- bis 2-ethylhexyl adipate, DOTP- dioctyl terephthalate, NR- Not reported.

## References

1. M. A. Babich, C. Bevington and M. A. Dreyfus, Plasticizer migration from children's toys, child care articles, art materials, and school supplies, *Regul. Toxicol. Pharmacol.*, 2020, **111**, 104574. <https://doi.org/10.1016/j.yrtph.2019.104574>
2. A. D. Godwin, in *Applied plastics engineering handbook (Second Edition)*, ed. M. Kutz, William Andrew Publishing, 2017, pp. 533-553. <https://doi.org/10.1016/B978-0-323-39040-8.00025-0>
3. F. Lessmann, L. Correia-Sá, C. Calhau, V. F. Domingues, T. Weiss, T. Brüning and H. M. Koch, Exposure to the plasticizer di(2-ethylhexyl) terephthalate (DEHTP) in Portuguese children – Urinary metabolite levels and estimated daily intakes, *Environ. Int.*, 2017, **104**, 25-32. <https://doi.org/10.1016/j.envint.2017.03.028>
4. S. Pan, D. Hou, J. Chang, Z. Xu, S. Wang, S. Yan, Q. Zeng, Z. Wang and Y. Chen, A potentially general approach to aliphatic ester-derived PVC plasticizers with suppressed migration as sustainable alternatives to DEHP, *Green Chem.*, 2019, **21**, 6430-6440. <https://doi.org/10.1039/C9GC03077H>
5. A. Stuart, D. J. LeCaptain, C. Y. Lee and D. K. Mohanty, Poly(vinyl chloride) plasticized with mixtures of succinate di-esters – synthesis and characterization, *Eur. Polym. J.*, 2013, **49**, 2785-2791. <https://doi.org/10.1016/j.eurpolymj.2013.06.023>
6. S. Buddhiranon, T. Chang, K. Tang and T. Kyu, Stabilization of epoxidized soybean oil-plasticized poly(vinyl chloride) blends via thermal curing with genistein, *J. Appl. Polym. Sci.*, 2018, **135**, 46472. <https://doi.org/10.1002/app.46472>
7. J. He, J. Li, L. Ma, N. Wu, Y. Zhang and Z. Niu, Large-scale distribution of organophosphate esters (flame retardants and plasticizers) in soil from residential area across China: Implications for current level, *Sci. Total Environ.*, 2019, **697**, 133997. <https://doi.org/10.1016/j.scitotenv.2019.133997>
8. H. C. Erythropel, A. Börmann, J. A. Nicell, R. L. Leask and M. Maric, Designing preen Plasticizers: Linear alkyl diol dibenzoate plasticizers and a thermally reversible plasticizer, *Polymers*, 2018, **10**. <https://doi.org/10.3390/polym10060646>
9. C. Okoro, Z. Mohammed, S. Jeelani and V. Rangari, Plasticizing effect of biodegradable dipropylene glycol bibenzoate and epoxidized linseed oil on diglycidyl ether of bisphenol A based epoxy resin, *J. Appl. Polym. Sci.*, 2021, **138**, 50661. <https://doi.org/10.1002/app.50661>
10. B. J. Hughes, K. Cox and V. Bhat, Derivation of an oral reference dose (RfD) for di 2-ethylhexyl cyclohexan-1,4-dicarboxylate (DEHCH), an alternative to phthalate plasticizers, *Regul. Toxicol. Pharmacol.*, 2018, **92**, 128-137. <https://doi.org/10.1016/j.yrtph.2017.11.010>
11. A. K. Mazitova, I. N. Vikhareva, G. K. Aminova and J. N. Savicheva, Application of zinc oxide to obtain and modify properties of adipate plasticizer of polyvinyl chloride. *Journal*, 2020, **12**. <https://doi.org/10.3390/polym12081728>
12. A.-M. Saillenfait, S. Ndaw, A. Robert and J.-P. Sabaté, Recent biomonitoring reports on phosphate ester flame retardants: a short review, *Arch. Toxicol.*, 2018, **92**, 2749-2778. <https://doi.org/10.1007/s00204-018-2275-z>
13. Y. Wang, C. Zhou, Y. Xiao, S. Zhou, C. Wang, X. Chen, K. Hu, X. Fu and J. Lei, Preparation and evaluation of acetylated mixture of citrate ester plasticizers for poly(vinyl chloride), *Iran. Polym. J.*, 2018, **27**, 423-432. <https://doi.org/10.1007/s13726-018-0620-y>

14. Y. Liu, Y. Tang, Y. He, H. Liu, S. Tao and W. Liu, Riverine inputs, spatiotemporal variations, and potential sources of phthalate esters transported into the Bohai Sea from an urban river in northern China, *Sci. Total Environ.*, 2023, **878**, 163253. <https://doi.org/10.1016/j.scitotenv.2023.163253>
15. J. Fernández-Arribas, T. Moreno and E. Eljarrat, Human exposure to organophosphate esters in water and packed beverages, *Environ. Int.*, 2023, **175**, 107936. <https://doi.org/10.1016/j.envint.2023.107936>
16. A. Ismanto, T. Hadibarata, R. A. Kristanti, L. Maslukah, N. Safinatunnajah and P. Sathishkumar, The abundance of endocrine-disrupting chemicals (EDCs) in downstream of the Bengawan Solo and Brantas rivers located in Indonesia, *Chemosphere*, 2022, **297**, 134151. <https://doi.org/10.1016/j.chemosphere.2022.134151>
17. M. Kotti, A. Papafilippaki and G. Stavroulakis, Simultaneous determination of selected pharmaceuticals and plasticisers in urban stormwater in Chania (Greece), *Int. J. Environ. Anal. Chem.*, 2023, **103**, 3790-3800. <https://doi.org/10.1080/03067319.2021.1913583>
18. E. Lorre, F. Bianchi, I. Vybernaite-Lubiene, J. Mėžinė and M. Zilius, Phthalate esters delivery to the largest European lagoon: Sources, partitioning and seasonal variations, *Environ. Res.*, 2023, **235**, 116667. <https://doi.org/10.1016/j.envres.2023.116667>
19. C. Wang, J. Wang, W. Gao, X. Ning, S. Xu, X. Wang, J. Chu, S. Ma, Z. Bai and G. Yue, The fate of phthalate acid esters in wastewater treatment plants and their impact on receiving waters, *Sci. Total Environ.*, 2023, **873**, 162201. <https://doi.org/10.1016/j.scitotenv.2023.162201>
20. L. Fang, A. Liu, M. Zheng, L. Wang, Y. Hua, X. Pan, H. Xu, X. Chen and Y. Lin, Occurrence and distribution of organophosphate flame retardants in seawater and sediment from coastal areas of the East China and Yellow Seas, *Environ. Pollut.*, 2022, **302**, 119017. <https://doi.org/10.1016/j.envpol.2022.119017>
21. G. Russo, S. Laneri, R. Di Lorenzo, I. Neri, I. Dini, R. Ciampaglia and L. Grumetto, Monitoring of pollutants content in bottled and tap drinking water in Italy, *Molecules*, 2022, **27**, 3990. <https://doi.org/10.3390/molecules27133990>
22. A. Elaiyaraja, M. Mayilsamy, K. Vimalkumar, N. P. Nikhil, P. M. Noorani, V. Bommuraj, N. Thajuddin, M. Mkandawire and R. B. Rajendran, Aquatic and human health risk assessment of humanogenic emerging contaminants (HECs), phthalate esters from the Indian Rivers, *Chemosphere*, 2022, **306**, 135624. <https://doi.org/10.1016/j.chemosphere.2022.135624>
23. P. Kumkar, C. R. Verma, Š. Hýsek, M. Pise, S. Żółtowska, S. M. Gosavi, F. Mercl, M. Božik, L. Praus and K. Hanková, Contaminants and their ecological risk assessment in beach sediments and water along the Maharashtra coast of India: A comprehensive approach using microplastics, heavy metal (loid) s, pharmaceuticals, personal care products and plasticizers, *Sci. Total Environ.*, 2023, 164712. <https://doi.org/10.1016/j.scitotenv.2023.164712>
24. R. Peñalver, A. Ortiz, N. Arroyo-Manzanares, N. Campillo, I. López-García and P. Viñas, Non-targeted analysis by DLLME-GC-MS for the monitoring of pollutants in the Mar Menor lagoon, *Chemosphere*, 2022, **286**, 131588. <https://doi.org/10.1016/j.chemosphere.2021.131588>
25. L. Struzina, M. A. P. Castro, C. Kubwabo, S. Siddique, G. Zhang, X. Fan, L. Tian, S. Bayen, N. Aneck-Hahn and R. Bornman, Occurrence of legacy and replacement plasticizers, bisphenols, and flame retardants in potable water in Montreal and South

- Africa, *Sci. Total Environ.*, 2022, **840**, 156581. <https://doi.org/10.1016/j.scitotenv.2022.156581>
26. S. Y. Wee, N. A. H. Ismail, D. E. M. Haron, F. M. Yusoff, S. M. Praveena and A. Z. Aris, Pharmaceuticals, hormones, plasticizers, and pesticides in drinking water, *J. Hazard. Mater.*, 2022, **424**, 127327. <https://doi.org/10.1016/j.jhazmat.2021.127327>
  27. L. Wang, J. Li, J. Zheng, J. Liang, R. Li and Z. Gong, Source tracing and health risk assessment of phthalate esters in household tap-water: A case study of the urban area of Quanzhou, Southeast China, *Ecotoxicol. Environ. Saf.*, 2022, **248**, 114277. <https://doi.org/10.1016/j.ecoenv.2022.114277>
  28. H. Rapp-Wright, S. Rodríguez-Mozaz, D. Álvarez-Muñoz, D. Barceló, F. Regan, L. P. Barron and B. White, International comparison, risk assessment, and prioritisation of 26 endocrine disrupting compounds in three european river catchments in the UK, Ireland, and Spain, *Molecules*, 2023, **28**, 5994. <https://doi.org/10.3390/molecules28165994>
  29. C. A. Schwanen and J. Schwarzbauer, Structural diversity of organic contaminants in a meso-scaled river system, *Water, Air, Soil Pollut.*, 2022, **233**, 33. <https://doi.org/10.1007/s11270-022-05503-1>
  30. K. Vimalkumar, M. Mayilsamy, E. Arun, B. Gobinath, S. Prasanth, P. N. Nikhil, S. Krishna-Kumar, S. Srimurali, M. Mkandawire and R. Babu-Rajendran, Screening of antimicrobials, fragrances, UV stabilizers, plasticizers and preservatives in sewage treatment plants (STPs) and their risk assessment in India, *Chemosphere*, 2022, **308**, 136452. <https://doi.org/10.1016/j.chemosphere.2022.136452>
  31. D. Cui, M. Ricardo and N. Quinete, A novel report on phthalates levels in Biscayne Bay surface waters and drinking water from South Florida, *Mar. Pollut. Bull.*, 2022, **180**, 113802. <https://doi.org/10.1016/j.marpolbul.2022.113802>
  32. M. Jayaweera, H. Perera, N. Bandara, G. Danushika, B. Gunawardana, C. Somaratne, J. Manatunge, K. Zoysa and T. Thathsara, Migration of phthalates from PET water bottle in events of repeated uses and associated risk assessment, *Environ. Sci. Pollut. Res.*, 2020, **27**, 39149-39163. <https://doi.org/10.1007/s11356-020-09925-4>
  33. M. A. Urmi, M. A. Akbor, S. Sarker, A. Nahar, M. A. A. Shaikh, M. A. B. Siddique, S. Ahmed, A. J. Meghna, G. Malafaia and M. M. Rahman, A pioneering study on endocrine disruptors (phthalates esters) in urban rivers of Bangladesh: An appraisal of possible risk assessment to ecology and human health, *J. Hazard. Mater. Adv.*, 2023, **12**, 100369. <https://doi.org/10.1016/j.hazadv.2023.100369>
  34. Q. Huang, X. Mao, F. Pan, X. Hu, Z. He, Y. Wang and Y. Wan, Organophosphate esters in source, finished, and tap water in Wuhan, China, *Chemosphere*, 2023, **325**, 138288. <https://doi.org/10.1016/j.chemosphere.2023.138288>
  35. S. Mishra, P. Kumar, I. Mehrotra and M. Kumar, Prevalence of organic micropollutants in the Yamuna River, Delhi, India: seasonal variations and governing factors, *Sci. Total Environ.*, 2023, **858**, 159684. <https://doi.org/10.1016/j.scitotenv.2022.159684>
  36. X. Xu, Y. Xu, N. Xu, B. Pan and J. Ni, Pharmaceuticals and personal care products (PPCPs) in water, sediment and freshwater mollusks of the Dongting Lake downstream the Three Gorges Dam, *Chemosphere*, 2022, **301**, 134721. <https://doi.org/10.1016/j.chemosphere.2022.134721>
  37. W. Zhang, C. Guo, J. Lv, X. Li and J. Xu, Organophosphate esters in sediment from Taihu Lake, China: Bridging the gap between riverine sources and lake sinks, *Front. Environ. Sci. Eng.*, 2022, **16**, 1-13. <https://doi.org/10.1007/s11783-021-1464-9>



38. C.-F. Chen, Y.-R. Ju, Y. C. Lim, M.-H. Wang, A. K. Patel, R. R. Singhanian, C.-W. Chen and C.-D. Dong, The effect of heavy rainfall on the exposure risks of sedimentary phthalate esters to aquatic organisms, *Chemosphere*, 2022, **290**, 133204. <https://doi.org/10.1016/j.chemosphere.2021.133204>
39. C. Scopetani, S. Selonen, A. Cincinelli and J. Pellinen, Chemical leaching from polyethylene mulching films to soil in strawberry farming, *Front. Environ. Sci.*, 2023, **11**, 250. <https://doi.org/10.3389/fenvs.2023.1129336>
40. Y. Chen, Y. Wang, Y. Tan, C. Jiang, T. Li, Y. Yang and Z. Zhang, Phthalate esters in the Largest River of Asia: An exploration as indicators of microplastics, *Sci. Total Environ.*, 2023, **902**, 166058. <https://doi.org/10.1016/j.scitotenv.2023.166058>
41. J. M. Park and S. H. Jhung, A remarkable adsorbent for removal of bisphenol S from water: Aminated metal-organic framework, MIL-101-NH<sub>2</sub>, *J. Chem. Eng.*, 2020, **396**, 125224. <https://doi.org/10.1016/j.cej.2020.125224>
42. L. Zhang, H. Cheng, D. Pan, Y. Wu, R. Ji, W. Li, X. Jiang and J. Han, One-pot pyrolysis of a typical invasive plant into nitrogen-doped biochars for efficient sorption of phthalate esters from aqueous solution, *Chemosphere*, 2021, **280**, 130712. <https://doi.org/10.1016/j.chemosphere.2021.130712>
43. J. You, C. Zhang, Z. Wu, Z. Ao, W. Sun, Z. Xiong, S. Su, G. Yao and B. Lai, N-doped graphite encapsulated metal nanoparticles catalyst for removal of Bisphenol A via activation of peroxydisulfate: A singlet oxygen-dominated oxidation process, *J. Chem. Eng.*, 2021, **415**, 128890. <https://doi.org/10.1016/j.cej.2021.128890>
44. S. Zhuang, X. Zhu and J. Wang, Adsorptive removal of plasticizer (dimethyl phthalate) and antibiotic (sulfamethazine) from municipal wastewater by magnetic carbon nanotubes, *J. Mol. Liq.*, 2020, **319**, 114267. <https://doi.org/10.1016/j.molliq.2020.114267>
45. K. M. Blum, C. Gallampois, P. L. Andersson, G. Renman, A. Renman and P. Haglund, Comprehensive assessment of organic contaminant removal from on-site sewage treatment facility effluent by char-fortified filter beds, *J. Hazard. Mater.*, 2019, **361**, 111-122. <https://doi.org/10.1016/j.jhazmat.2018.08.009>
46. V. Matamoros, R. Gutiérrez, I. Ferrer, J. García and J. M. Bayona, Capability of microalgae-based wastewater treatment systems to remove emerging organic contaminants: A pilot-scale study, *J. Hazard. Mater.*, 2015, **288**, 34-42. <https://doi.org/10.1016/j.jhazmat.2015.02.002>
47. M. Trojanowicz, A. Bojanowska-Czajka, T. Szreder, S. Męczyńska-Wielgosz, K. Bobrowski, E. Fornal and H. Nichipor, Application of ionizing radiation for removal of endocrine disruptor bisphenol A from waters and wastewaters, *J. Chem. Eng.*, 2021, **403**, 126169. <https://doi.org/10.1016/j.cej.2020.126169>
48. L. Carstens, A. R. Cowan, B. Seiwert and D. Schlosser, Biotransformation of phthalate plasticizers and bisphenol A by marine-derived, freshwater, and terrestrial fungi, 2020, **11**. <https://doi.org/10.3389/fmicb.2020.00317>
49. F. Marrakchi, F. Fazeli Zafar, M. Wei and S. Wang, Cross-linked FeCl<sub>3</sub>-activated seaweed carbon/MCM-41/alginate hydrogel composite for effective biosorption of bisphenol A plasticizer and basic dye from aqueous solution, *Bioresour. Technol.*, 2021, **331**, 125046. <https://doi.org/10.1016/j.biortech.2021.125046>
50. Z. Song, F.-R. Xiu and Y. Qi, Degradation and partial oxidation of waste plastic express packaging bags in supercritical water: Resources transformation and pollutants removal, *J. Hazard. Mater.*, 2022, **423**, 127018. <https://doi.org/10.1016/j.jhazmat.2021.127018>

51. J.-M. Xu, S.-H. Chou, Y. Zhang, M. Kumar and S.-Y. Shen, Degradation of dibutyl phthalate plasticizer in water by High-performance IrO<sub>2</sub>-Ta<sub>2</sub>O<sub>5</sub>/Ti electrocatalytic electrode, *Catalysts*, 2021, **11**. <https://doi.org/10.3390/catal11111368>
52. R. A. de Toledo, U. Hin Chao, T. Shen, Q. Lu, X. Li and H. Shim, Development of hybrid processes for the removal of volatile organic compounds, plasticizer, and pharmaceutically active compound using sewage sludge, waste scrap tires, and wood chips as sorbents and microbial immobilization matrices, *Environ. Sci. Pollut. Res.*, 2019, **26**, 11591-11604. <https://doi.org/10.1007/s11356-018-2877-2>
53. K. M. Gani, F. Bux and A. A. Kazmi, Diethylhexyl phthalate removal in full scale activated sludge plants: Effect of operational parameters, *Chemosphere*, 2019, **234**, 885-892. <https://doi.org/10.1016/j.chemosphere.2019.06.130>
54. H. Chi, X. He, J. Zhang and J. Ma, Efficient degradation of refractory organic contaminants by zero-valent copper/hydroxylamine/peroxymonosulfate process, *Chemosphere*, 2019, **237**, 124431. <https://doi.org/10.1016/j.chemosphere.2019.124431>
55. Y. Wang, X. Wei, Y. Qi and H. Huang, Efficient removal of bisphenol-A from water and wastewater by Fe<sub>2</sub>O<sub>3</sub>-modified graphene oxide, *Chemosphere*, 2021, **263**, 127563. <https://doi.org/10.1016/j.chemosphere.2020.127563>
56. Q. Xiang, W. Cheng, S. Wen, B. Wu, J. Sun and S. Wang, Electro-peroxone with solid polymer electrolytes: A novel system for degradation of plasticizers in natural effluents, *Water Res.*, 2022, 118302. <https://doi.org/10.1016/j.watres.2022.118302>
57. D. Mitra, C. Zhou, M. H. Bin Hashim, T. M. Hang, K. Y.-H. Gin, C.-H. Wang and K. G. Neoh, Emerging pharmaceutical and organic contaminants removal using carbonaceous waste from oil refineries, *Chemosphere*, 2021, **271**, 129542. <https://doi.org/10.1016/j.chemosphere.2021.129542>
58. Z. Wang, F. Cui, Y. Pan, L. Hou, B. Zhang, Y. Li and L. Zhu, Hierarchically micro-mesoporous  $\beta$ -cyclodextrin polymers used for ultrafast removal of micropollutants from water, *Carbohydr. Polym.*, 2019, **213**, 352-360. <https://doi.org/10.1016/j.carbpol.2019.03.021>
59. H. Zhang, C. Zhao and H. Na, Enhanced biodegradation of phthalic acid esters' derivatives by plasticizer-degrading bacteria (*Burkholderia cepacia*, *Archaeoglobus fulgidus*, *Pseudomonas aeruginosa*) using a correction 3D-QSAR model, *Int. J. Environ. Res. Public Health*, 2020, **17**. <https://doi.org/10.3390/ijerph17155299>
60. C.-M. Ma, T.-J. Yu, C.-H. Yang and G.-B. Hong, Enhancement of plasticizer adsorption by utilizing a rice bran-derived adsorbent, *Ecotoxicol. Environ. Saf.*, 2021, **228**, 112972. <https://doi.org/10.1016/j.ecoenv.2021.112972>
61. H. Kan, T. Wang, Z. Yang, R. Wu, J. Shen, G. Qu and H. Jia, High frequency discharge plasma induced plasticizer elimination in water: Removal performance and residual toxicity, *J. Hazard. Mater.*, 2020, **383**, 121185. <https://doi.org/10.1016/j.jhazmat.2019.121185>
62. Q. Wang, T. Wang, G. Qu, Y. Zhang, Q. Sun, X. Guo and H. Jia, High-efficient removal of tetrabromobisphenol A in aqueous by dielectric barrier discharge: Performance and degradation pathways, *Sep. Purif. Technol.*, 2020, **240**, 116615. <https://doi.org/10.1016/j.seppur.2020.116615>
63. Y. Hu, Q. Niu, Y. Wang, Y.-n. Zhang and G. Zhao, Highly efficient removal mechanism of dimethyl phthalate over an economical 3D {001}TiO<sub>2</sub>/Ti photoelectrode with enhanced

- photoelectrocatalytic activity and long service life, *Appl. Catal. B: Environ.*, 2021, **285**, 119812. <https://doi.org/10.1016/j.apcatb.2020.119812>
64. P. Bhattacharya, D. Mukherjee, N. Deb, S. Swarnakar and S. Banerjee, Indigenously developed CuO/TiO<sub>2</sub> coated ceramic ultrafiltration membrane for removal of emerging contaminants like phthalates and parabens: Toxicity evaluation in PA-1 cell line, *Mater. Chem. Phys.*, 2021, **258**, 123920. <https://doi.org/10.1016/j.matchemphys.2020.123920>
  65. Z. Wang, B. Zhang, C. Fang, Z. Liu, J. Fang and L. Zhu, Macroporous membranes doped with micro-mesoporous  $\beta$ -cyclodextrin polymers for ultrafast removal of organic micropollutants from water, *Carbohydr. Polym.*, 2019, **222**, 114970. <https://doi.org/10.1016/j.carbpol.2019.114970>
  66. R. G. Sawers, o-Phthalate derived from plastics' plasticizers and a bacterium's solution to its anaerobic degradation, *Mol. Microbiol.*, 2018, **108**, 595-600. <https://doi.org/10.1111/mmi.13975>
  67. R. J. Wright, R. Bosch, M. I. Gibson and J. A. Christie-Oleza, Plasticizer degradation by marine bacterial isolates: A proteogenomic and metabolomic characterization, *Environ. Sci. Technol.*, 2020, **54**, 2244-2256. <https://doi.org/10.1021/acs.est.9b05228>
  68. Z.-H. Chen, Z. Liu, J.-Q. Hu, Q.-W. Cai, X.-Y. Li, W. Wang, Y. Faraj, X.-J. Ju, R. Xie and L.-Y. Chu,  $\beta$ -Cyclodextrin-modified graphene oxide membranes with large adsorption capacity and high flux for efficient removal of bisphenol A from water, *J. Membr. Sci.*, 2020, **595**, 117510. <https://doi.org/10.1016/j.memsci.2019.117510>
  69. A. M. Balahouanea, N. Benosmanea, B. Boutemeura, S. M. Hamdic and M. Hamdia, Removal of Bisphenol A from synthetic wastewater solutions using a polymer inclusion membrane, *Desalin. Water Treat.*, 2020, **208**, 367-376. <https://doi.org/10.5004/dwt.2020.26470>
  70. S. Ziembowicz, M. Kida and P. Koszelnik, Removal of dibutyl phthalate (DBP) from landfill leachate using an ultrasonic field, *Desalin. Water Treat.*, 2018, **4**, 13. <https://doi.org/10.5004/dwt.2018.21961>
  71. C. Reyes Contreras, D. López, A. M. Leiva, C. Domínguez, J. M. Bayona and G. Vidal, Removal of organic micropollutants in wastewater treated by activated sludge and constructed wetlands: A comparative study, *Water*, 2019, **11**. <https://doi.org/10.3390/w11122515>
  72. M. Duran, Ö. Arar and M. Arda, Removal of phthalic acid and isophthalic acid from aqueous solution by anion exchange resin, *J. Chil. Chem. Soc.*, 2019, **64**, 4399-4403. <http://dx.doi.org/10.4067/s0717-97072019000104399>
  73. G. Choo and J.-E. Oh, Seasonal occurrence and removal of organophosphate esters in conventional and advanced drinking water treatment plants, *Water Res.*, 2020, **186**, 116359. <https://doi.org/10.1016/j.watres.2020.116359>
  74. J. Tian, J. Wei, H. Zhang, Z. Kong, Y. Zhu and Z. Qin, Graphene oxide-functionalized dual-scale channels architecture for high-throughput removal of organic pollutants from water, *J. Chem. Eng.*, 2019, **359**, 852-862. <https://doi.org/10.1016/j.cej.2018.12.048>
  75. X. Zhao, R. Wang, L. Dong, W. Li, M. Li and H. Wu, Simultaneous removal of nitrogen and dimethyl phthalate from low-carbon wastewaters by using intermittently-aerated constructed wetlands, *J. Hazard. Mater.*, 2021, **404**, 124130. <https://doi.org/10.1016/j.jhazmat.2020.124130>

76. P. Li, Z.-h. Liang, Z. Jiang, Z. Qiu, B. Du, Y.-b. Liu, W.-z. Li and L.-h. Tan, Supercritical fluid extraction effectively removes phthalate plasticizers in spores of *Ganoderma lucidum*, *Food Sci. Biotechnol.*, 2018, **27**, 1857-1864. <https://doi.org/10.1007/s10068-018-0404-3>
77. Y. Wang, W. Gao, Y. Wang and G. Jiang, Suspect screening analysis of the occurrence and removal of micropollutants by GC-QTOF MS during wastewater treatment processes, *J. Hazard. Mater.*, 2019, **376**, 153-159. <https://doi.org/10.1016/j.jhazmat.2019.05.031>
78. X. Wan, L. Zhang, Z. Sun, W. Yu and H. Xie, Treatment of high concentration phthalate plasticizer wastewater by ozone microbubble oxidation, *Water, Air, Soil Pollut.*, 2020, **231**, 367. <https://doi.org/10.1007/s11270-020-04735-3>
79. Y. Wang, W. Zhan, Y. Liu, S. Cheng, C. Zhang, J. Ma and R. Chen, Di-n-octyl phthalate degradation by a halotolerant bacterial consortium LF and its application in soil, *Environ. Technol.*, 2021, **42**, 2749-2756. <https://doi.org/10.1080/09593330.2020.1713903>
80. I. Ferreira and D. Morita, Ex-situ bioremediation of Brazilian soil contaminated with plasticizers process wastes, *Braz. J. Chem. Eng.*, 2012, **29**, 77-86. <https://doi.org/10.1590/S0104-66322012000100009>
81. S. Nalli, D. G. Cooper and J. A. Nicell, Biodegradation of plasticizers by *Rhodococcus rhodochrous*, *Biodegradation*, 2002, **13**, 343-352. <https://doi.org/10.1023/A:1022313810852>
82. S. Nalli, D. G. Cooper and J. A. Nicell, Metabolites from the biodegradation of di-ester plasticizers by *Rhodococcus rhodochrous*, *Sci. Total Environ.*, 2006, **366**, 286-294. <https://doi.org/10.1016/j.scitotenv.2005.06.020>
83. D. Kumar, L. Shukla, S. B. Singh, L. Nain and S. Singh, Bacterial consortium for efficient degradation of di-ethyl phthalate in soil microcosm, *Environ. Sustain.*, 2021, **4**, 797-804. <https://doi.org/10.1007/s42398-021-00199-1>
84. Y. Wang, Q. Ren, W. Zhan, K. Zheng, Q. Liao, Z. Yang, Y. Wang and X. Ruan, Biodegradation of di-n-octyl phthalate by *Gordonia* sp. Lff and its application in soil, *Environ. Technol.*, 2021, 1-8. <https://doi.org/10.1080/09593330.2021.1890839>
